# Supplementary material for: Silver trifluoroacetate as a bifunctional reagent for palladium-catalyzed oxidative carbonylative [4 + 1] annulation of aromatic acids
Source: Royal Society of Chemistry journal article supplement (doi:10.1039/d3qo00219e), 2023-01-01

## **AgTFA as a Bifunctional Reagent for Palladium-Catalyzed Oxidative Carbonylative [4+1] Annulation of Aromatic acids**

Zhuang-Zhuang Li,<sup>a</sup> Wan-Di Li,<sup>a</sup> Juan Fan,<sup>a</sup> Jun-Ting Li,<sup>a</sup> Zhong-Wen Liu<sup>a</sup> and Xian-Ying Shi<sup>\*a</sup>

### **Table of contents**

|              |                                                   |     |
|--------------|---------------------------------------------------|-----|
| <b>I.</b>    | General experimental details                      | S2  |
| <b>II.</b>   | General experimental procedure for the reaction   | S2  |
| <b>III.</b>  | Procedure for the synthesis of 3a on 1 mmol scale | S2  |
| <b>IV.</b>   | The results of unactive substrates                | S3  |
| <b>V.</b>    | The recovery of silver                            | S3  |
| <b>VI.</b>   | Mechanistic studies                               | S4  |
| <b>VII.</b>  | Experimental characterization data for compounds  | S9  |
| <b>VIII.</b> | References                                        | S16 |
| <b>IX.</b>   | Copies of NMR spectra                             | S17 |

## I. General experimental details

All reagents were obtained from commercial suppliers and utilized without further purification. All work-up and purification procedures were carried out with analytical reagent solvents.  $^1\text{H}$  NMR spectra and  $^{13}\text{C}$  NMR spectra were recorded on a 400 MHz or 600 MHz spectrometer with tetramethylsilane (TMS) as internal standard at room temperature. Chemical shifts are given in  $\delta$  relative to TMS, with the coupling constants  $J$  given in Hz. High-resolution mass spectra (HRMS) were detected by a Bruker Compass-Maxis instrument (ESI or APCI). Melting points were determined using WRX-4 without correction. X-ray diffraction (XRD) patterns were recorded on an X-ray diffractometer (Bruker D8 Advance) equipped with Cu-K $\alpha$  radiation (40 kV, 40 mA). The sample was scanned from the  $2\theta$  of  $30^\circ$  to  $100^\circ$  with a rate of 0.2 s/step. Gas chromatography (GC) were recorded on a SHIMADZU GC-2010 Plus instrument equipped with a FID detector and a DB-5 column).

## II. General experimental procedure for the reaction

An reaction vessel was charged with aromatic acids (0.1 mmol),  $\text{CF}_3\text{CO}_2\text{Ag}$  (90.2 mg, 0.4 mmol),  $\text{Pd}(\text{TFA})_2$  (3.5 mg, 10 mol%, 0.01 mmol),  $\text{CH}_3\text{CN}$  (0.5 mL). The reaction vessel was sealed under air. Then, the mixture was stirred at  $150^\circ\text{C}$  for 24 h. After the reaction was completed, the resulting mixture was cooled to room temperature, diluted with EtOAc, and filtered via a short silica gel pad. The solution was concentrated under vacuum, and the residue was purified by a preparative TLC to afford the desired product.

## III. Procedure for the synthesis of 3a on 1 mmol scale

An 10 mL Schlenk tube was charged with 2-methylbenzoic acid (139 mg, 1 mmol),  $\text{CF}_3\text{CO}_2\text{Ag}$  (902 mg, 4 mmol),  $\text{Pd}(\text{TFA})_2$  (35 mg, 10 mol%, 0.1 mmol),  $\text{CH}_3\text{CN}$  (3 mL). The reaction vessel was sealed under air. Then, the mixture was reacted at  $150^\circ\text{C}$  (oil bath temperature) for 15 h. After the reaction was completed, the resulting mixture was cooled to room temperature, and concentrated to give a crude product, which is purified by silica-gel column chromatography using hexane/EtOAc/HOAc (5/1/0.05) to yield compound 3a (0.099 g, 61%).

## IV. The results of unactive substrates

Table S1 The results of unactive substrates<sup>a</sup>

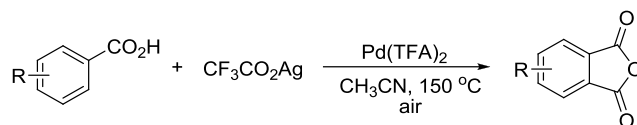

| Entry | Aromatic acids                  | Yield (%) <sup>[b]</sup> |
|-------|---------------------------------|--------------------------|
| 1     | 4-chlorobenzoic acid            | 45                       |
| 2     | 3-chlorobenzoic acid            | 33                       |
| 3     | 4-bromobenzoic acid             | 20                       |
| 4     | 2,4,5-trimethylbenzoic acid     | 46                       |
| 5     | 2-methyl-4-methoxybenzoic acid  | 41                       |
| 6     | 4-ethoxybenzoic acid            | 30                       |
| 7     | 1-naphthoic acid                | 45                       |
| 8     | 2-naphthoic acid                | 33                       |
| 9     | 3-fluoro-2-methylbenzoic acid   | 42                       |
| 10    | 4-fluoro-2-methylbenzoic acid   | 46                       |
| 11    | 4-hydroxybenzoic acid           | 28                       |
| 12    | 2-biphenylcarboxylic acid       | 49                       |
| 13    | 2-phenoxybenzoic acid           | ND                       |
| 14    | 2-cyanobenzoic Acid             | ND                       |
| 15    | 2-nitrobenzoic acid             | ND                       |
| 16    | 4-tert-butylbenzoic acid        | 40                       |
| 17    | 2-fluorobenzoic acid            | 23                       |
| 18    | 2-bromobenzoic acid             | ND                       |
| 19    | 3-bromo-2-methylbenzoic acid    | 31                       |
| 20    | 4-bromo-2-methylbenzoic acid    | 16                       |
| 21    | 2-methyl-4-chlorobenzoic acid   | 45                       |
| 22    | 3-(trifluoromethyl)benzoic acid | ND                       |
| 23    | 3-chloro-4-methylbenzoic acid   | 22                       |
| 24    | 2-acetylbenzoic acid            | ND                       |

<sup>a</sup> Reaction conditions: acids (0.1 mmol), CF<sub>3</sub>CO<sub>2</sub>Ag (0.4 mmol), Pd(TFA)<sub>2</sub> (10 mol%), CH<sub>3</sub>CN (0.5 mL), 150 °C, 24 h, under air. <sup>b</sup> Determined by <sup>1</sup>H NMR analysis of the crude reaction mixture using 1,3,5-trimethoxybenzene as internal standard.

## V. The recovery of silver

When the reaction was completed, bright silver particles shown as Figure S1A. were deposited on the bottom of the reaction tube. After the upper suspension was decanted, high purity silver can be acquired when the particles on the bottom was washed with ethyl acetate three times (Figure S1B).

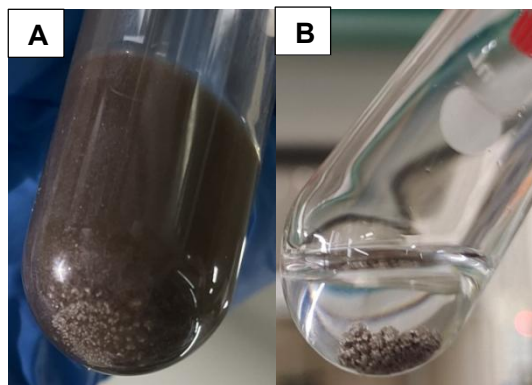

Figure S1 The picture after reaction.

## VI. Mechanistic studies

### 6.1 *Ortho* deuteration experiment

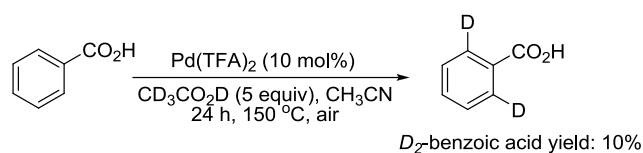

An reaction vessel was charged with benzoic acid (12.2 mg, 0.1 mmol), Pd(TFA)<sub>2</sub> (3.5 mg, 10 mol%, 0.01 mmol), CD<sub>3</sub>CO<sub>2</sub>D (0.5 mmol, 29  $\mu$ L), CH<sub>3</sub>CN (0.5 mL), and sealed under air. Then, the mixture was stirred at 150 °C (oil bath temperature) for 24 h. After the reaction was completed, the resulting mixture was cooled to room temperature, diluted with EtOAc and filtered through a short silica gel pad. The solvent was removed under reduced pressure and the amount of *ortho*-deuterated benzoic acid was determined by integral area in <sup>1</sup>H NMR.

### <sup>1</sup>H NMR spectra of crude reaction mixture of *ortho* deuteration experiment

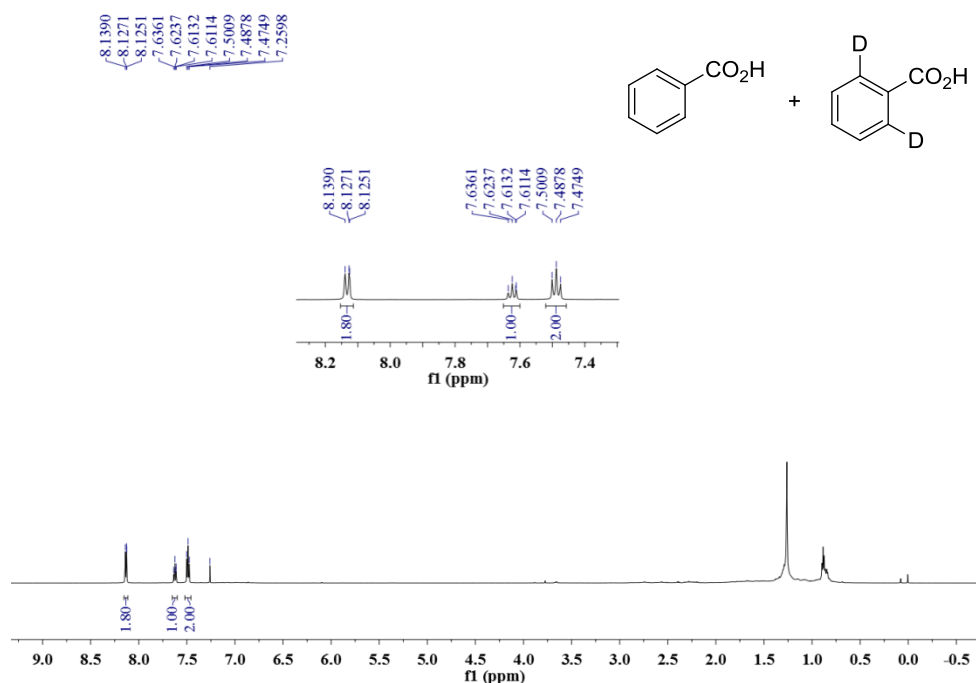

## <sup>1</sup>H NMR spectra of benzoic acid

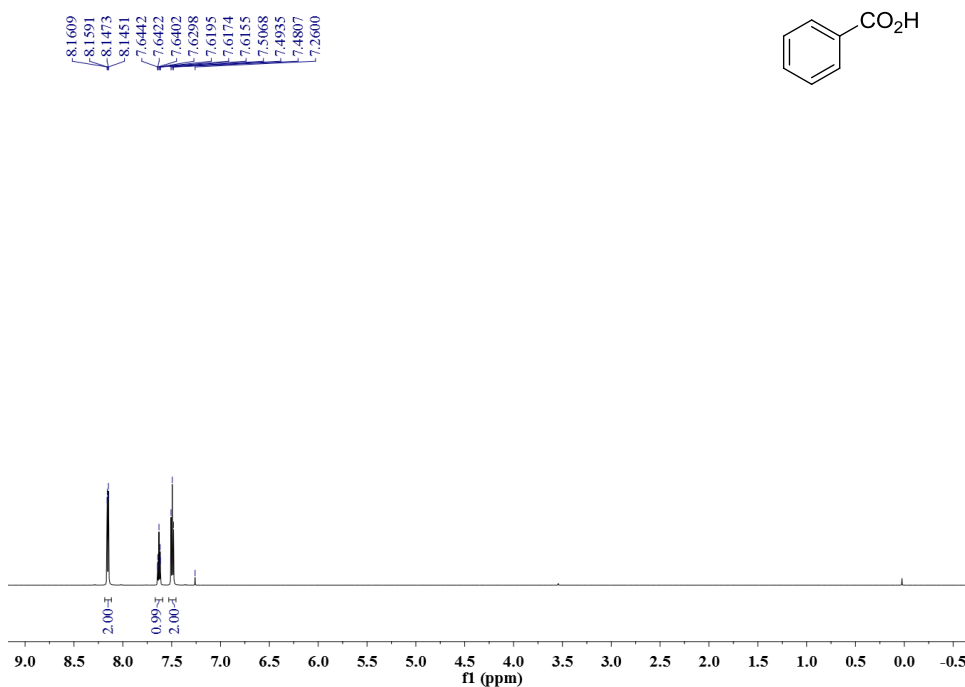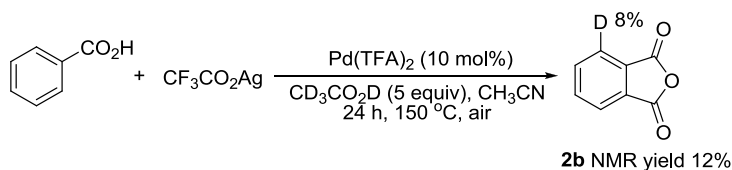

An reaction vessel was charged with benzoic acid (12.2 mg, 0.1 mmol),  $\text{CF}_3\text{CO}_2\text{Ag}$  (90.2 mg, 0.4 mmol),  $\text{Pd(TFA)}_2$  (3.5 mg, 10 mol%, 0.01 mmol),  $\text{CD}_3\text{CO}_2\text{D}$  (0.5 mmol, 29  $\mu\text{L}$ ),  $\text{CH}_3\text{CN}$  (0.5 mL), and sealed under air. The resulting mixture was stirred at 150  $^\circ\text{C}$  (oil bath temperature) for 24 h. After the reaction was completed, the mixture was cooled to room temperature, diluted with EtOAc and filtered through a short silica gel pad. The solvent was removed under reduced pressure, the yield of product **2b** was determined by <sup>1</sup>H NMR analysis of the crude reaction mixture using 1,3,5-trimethoxybenzene as an internal standard. The product **2b** was purified by a preparative TLC using hexane/EtOAc/HOAc (100/1/0.05). The amount of *ortho*-deuterated **2b** was determined by integral area in <sup>1</sup>H NMR.

## $^1\text{H}$ NMR spectra of $D_1$ -2b and 2b

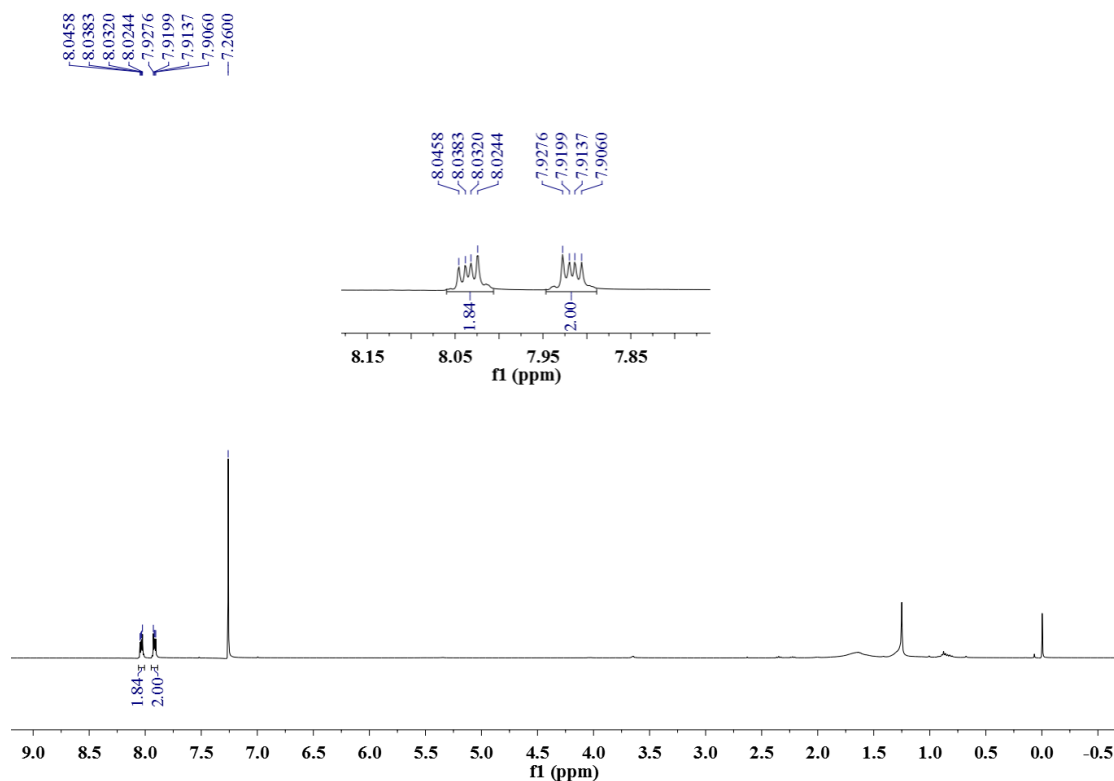

## 6.2 KIE experiment (parallel experiments)

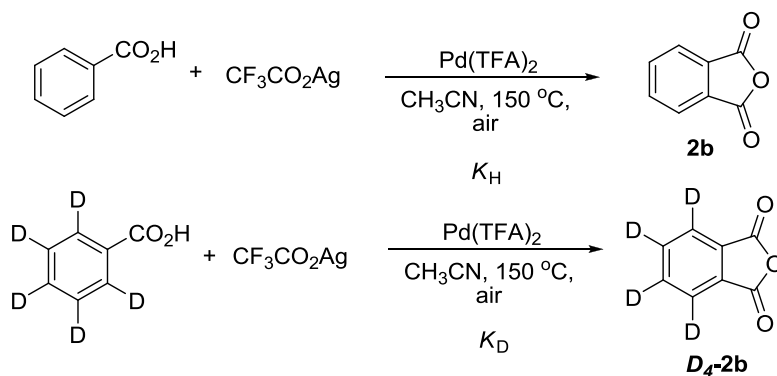

$\text{Pd}(\text{TFA})_2$  (3.5 mg, 0.01 mmol), benzoic acid (12.2 mg, 0.1 mmol),  $\text{CF}_3\text{CO}_2\text{Ag}$  (90.2 mg, 0.4 mmol),  $\text{CH}_3\text{CN}$  (0.5 mL) were successively added to a reaction vessel equipped with a stir bar. In another reaction vessel, benzoic acid was replaced by  $D_5$ -benzoic acid (13.0 mg, 0.1 mmol). The vessel was sealed under air. The two reactions were stirred at  $150\text{ }^\circ\text{C}$  (oil bath temperature) for 20 min, 30 min, 40 min, and 50 min, respectively. Then the two reaction mixtures were filtered through a short silica gel pad. The solvent was then removed under reduced pressure. The KIE was determined by GC, and the yield of phthalic anhydride was determined by external standard method. Thus the KIE was found to be 1.18.

**Table S2** The yields of **2b** and **D<sub>4</sub>-2b**

| Entry | Time (min) | Yield of <b>2b</b> (%) | Yield of <b>D<sub>4</sub>-2b</b> (%) |
|-------|------------|------------------------|--------------------------------------|
| 1     | 20         | 5.84                   | 4.55                                 |
| 2     | 30         | 7.37                   | 6.65                                 |
| 3     | 40         | 9.76                   | 8.05                                 |
| 4     | 50         | 11.50                  | 9.56                                 |

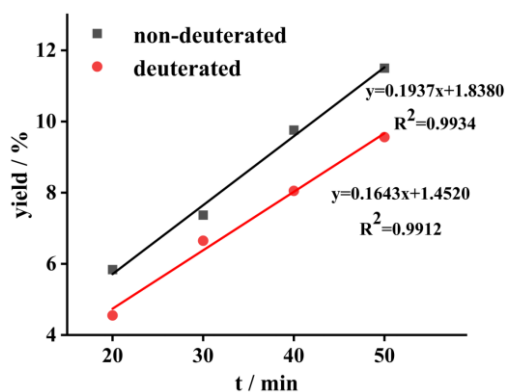

### 6.3 KIE experiment (intermolecular experiment)

Pd(TFA)<sub>2</sub> (3.5 mg, 0.01 mmol), benzoic acid (0.05 mmol, 6.1 mg), benzoic acid-2,5-*d*<sub>2</sub> (0.05 mmol, 6.2 mg), CF<sub>3</sub>CO<sub>2</sub>Ag (90.2 mg, 0.4 mmol), CH<sub>3</sub>CN (0.5 mL) were successively added to a reaction vessel equipped with a stir bar. The vessel was sealed under air and stirred at 150 °C (oil bath temperature) for 6 h. Then the reaction mixture was filtered through a short column. The solvent was then removed under reduced pressure. The ratio of **2b**: **D-2b** = 2.83 was determined by <sup>1</sup>H NMR of crude reaction mixture using relative integral area.

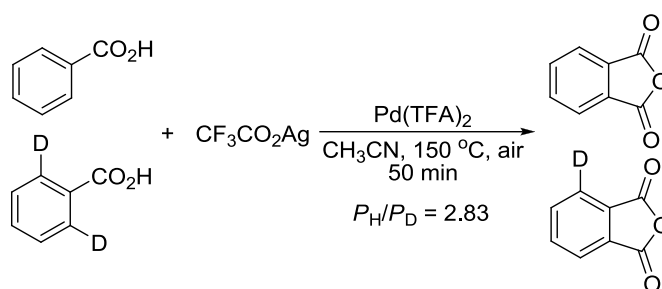

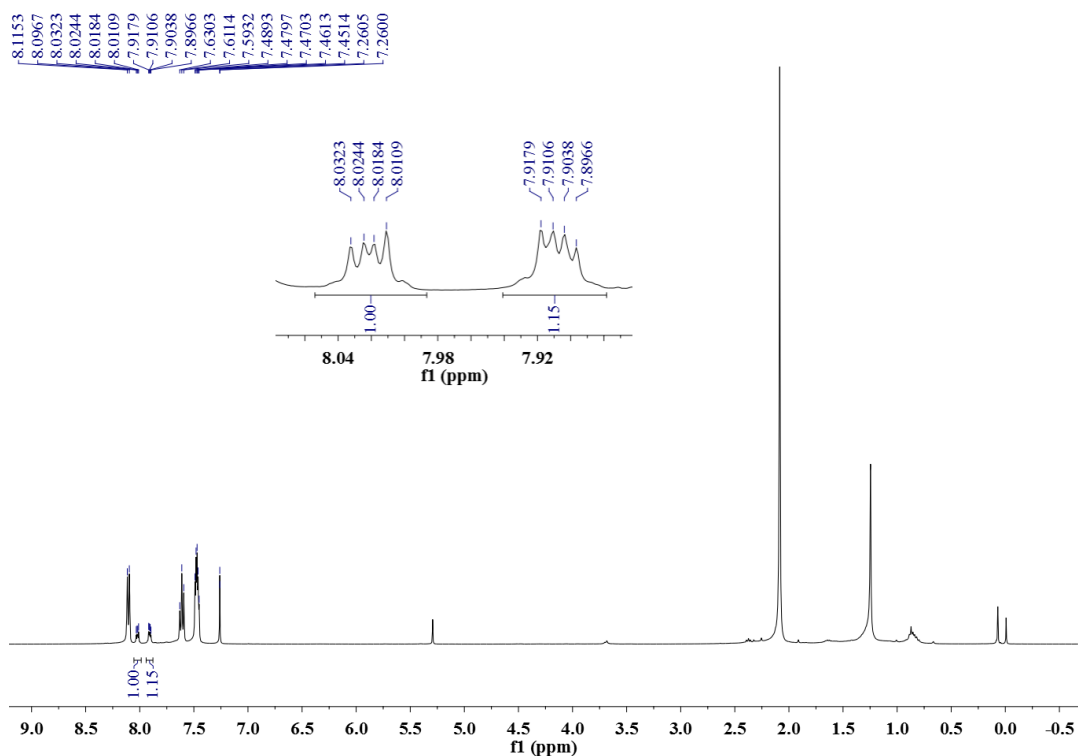

#### 6.4 TG analysis of AgTFA

The stability of AgTFA was investigated by thermogravimetric analysis on a Q1000DSC+LNCS+FACS Q600SDT thermal analyzer (USA). The detection was taken from 40 °C to 390 °C at a ramp of 10 °C min<sup>-1</sup> under a constant flow of air.

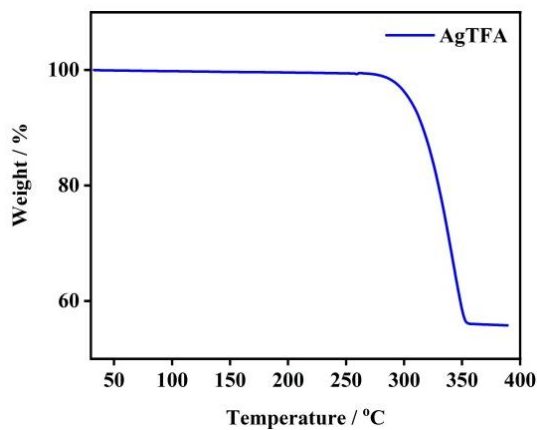

Figure S2 TG analysis of AgTFA.

#### 6.5 Gas detection results of control experiments

The gas mixture was analyzed by gas chromatography (GC-7920, China Education Au-Light Technology Co., Ltd.) equipped with FID and TDX-01 column (injector temperature: 100 °C, column furnace temperature: 60 °C, FID temperature: 160 °C, Ar as carrier gas).



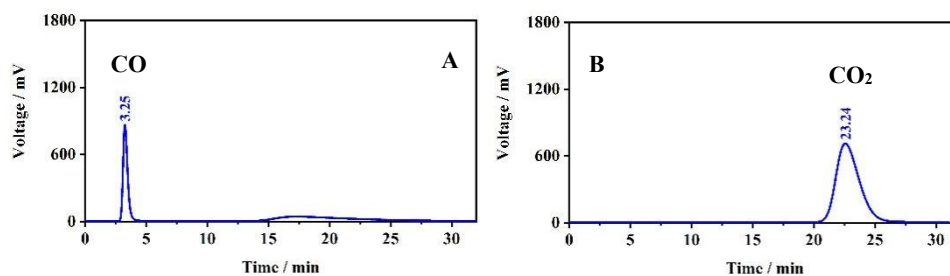

**Figure S3** Retention time of CO (A) and CO<sub>2</sub> (B).

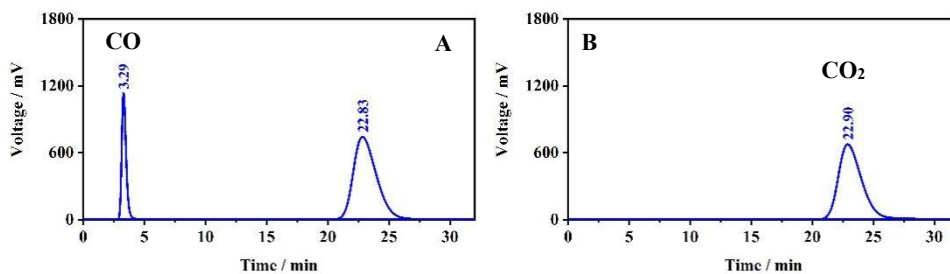

**Figure S4** Gas analysis after reaction, reaction conditions: (A) CF<sub>3</sub>CO<sub>2</sub>Ag (0.4 mmol), Pd(TFA)<sub>2</sub> (0.01 mmol), CH<sub>3</sub>CN (0.5 mL), 150 °C, 24 h, under Ar; (B) 2-methylbenzoic acid (0.1 m mol), CF<sub>3</sub>CO<sub>2</sub>Ag (0.4 mmol), Pd(TFA)<sub>2</sub> (0.01 mmol), CH<sub>3</sub>CN (0.5 mL), 150 °C, 24 h, under Ar.

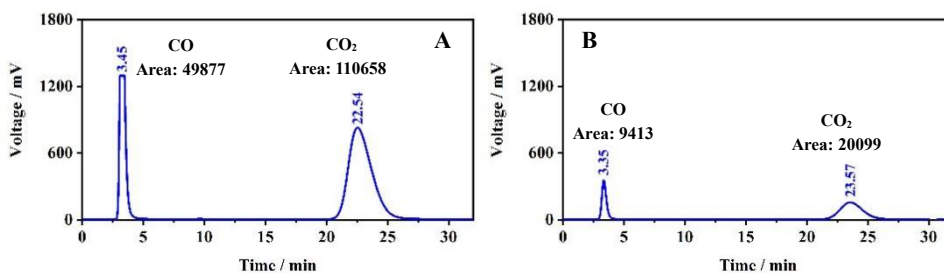

**Figure S5** Gas analysis after reaction, reaction conditions: (A) CF<sub>3</sub>CO<sub>2</sub>Ag (0.4 mmol), CH<sub>3</sub>CN (0.5 mL), 150 °C, 24 h, under Ar; (B) 2,2,6,6-tetramethylpiperidine-*N*-oxyl (0.2 mmol), CF<sub>3</sub>CO<sub>2</sub>Ag (0.4 mmol), CH<sub>3</sub>CN (0.5 mL), 150 °C, 24 h, under Ar.

## VII. Experimental characterization data for compounds

### 4-methylisobenzofuran-1,3-dione (2a)<sup>1</sup>

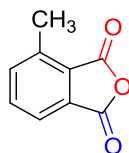

11.3 mg, 70% (isolated yield), white solid, mp 129.9-130.9 °C,  $R_f$  = 0.40 (hexane/EtOAc/HOAc = 5/1/0.05). <sup>1</sup>H NMR (400 MHz, CDCl<sub>3</sub>):  $\delta$  [ppm] = 7.84 (d,  $J$  = 7.4 Hz, 1H), 7.76 (t,  $J$  = 7.5 Hz, 1H), 7.66 (d,  $J$  = 7.5 Hz, 1H), 2.74 (s, 3H). <sup>13</sup>C{<sup>1</sup>H} NMR (100 MHz, CDCl<sub>3</sub>):  $\delta$  [ppm] = 163.1, 162.9, 140.5, 137.9, 135.7, 131.6, 128.5, 123.3, 17.7. HRMS (ESI)  $m/z$  calculated for C<sub>9</sub>H<sub>7</sub>O<sub>3</sub> [M+H]<sup>+</sup> 163.0390, found: 163.0389.

### isobenzofuran-1,3-dione (2b)<sup>2</sup>

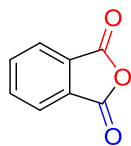

8.9 mg, 60% (isolated yield), white solid, mp 130.3-131.9 °C,  $R_f = 0.07$  (hexane/EtOAc/HOAc = 100/1/0.05).  $^1\text{H NMR}$  (600 MHz,  $D_6$ -DMSO):  $\delta$  [ppm] = 8.09 (dd,  $J = 5.6, 3.1$  Hz, 2H), 8.01 (dd,  $J = 5.6, 3.0$  Hz, 2H).  $^{13}\text{C}\{^1\text{H}\}$  NMR (150 MHz,  $D_6$ -DMSO):  $\delta$  [ppm] = 163.3, 136.2, 131.2, 125.4. HRMS (ESI)  $m/z$  calculated for  $\text{C}_8\text{H}_5\text{O}_3$   $[\text{M}+\text{H}]^+$  149.0233, found: 149.0238.

### 4-ethylisobenzofuran-1,3-dione (2c)<sup>3</sup>

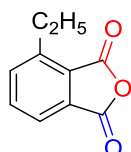

11.1 mg, 63% (isolated yield), white solid, mp 99.1-100.0 °C,  $R_f = 0.03$  (hexane/EtOAc/HOAc = 50/1/0.05).  $^1\text{H NMR}$  (600 MHz,  $\text{CDCl}_3$ ):  $\delta$  [ppm] = 7.85 (d,  $J = 7.4$  Hz, 1H), 7.79 (t,  $J = 7.6$  Hz, 1H), 7.70 (d,  $J = 7.6$  Hz, 1H), 3.14 (q,  $J = 7.6$  Hz, 2H), 1.32 (t,  $J = 7.6$  Hz, 3H).  $^{13}\text{C}\{^1\text{H}\}$  NMR (150 MHz,  $\text{CDCl}_3$ ):  $\delta$  [ppm] = 163.0, 162.9, 146.8, 136.3, 135.9, 131.8, 127.9, 123.3, 24.7, 14.6. HRMS (ESI)  $m/z$  calculated for  $\text{C}_{10}\text{H}_9\text{O}_3$   $[\text{M}+\text{H}]^+$  177.0546, found: 177.0546.

### 4-isopropylisobenzofuran-1,3-dione (2d)<sup>4</sup>

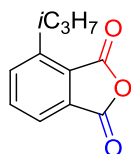

12.5 mg, 66% (isolated yield), white solid, mp 68.7-69.0 °C,  $R_f = 0.54$  (hexane/EtOAc/HOAc = 4/1/0.05).  $^1\text{H NMR}$  (600 MHz,  $\text{CDCl}_3$ ):  $\delta$  [ppm] = 7.86 – 7.78 (m, 3H), 4.10 – 3.84 (m, 1H), 1.34 (s, 3H), 1.33 (s, 3H).  $^{13}\text{C}\{^1\text{H}\}$  NMR (150 MHz,  $\text{CDCl}_3$ ):  $\delta$  [ppm] = 163.0, 162.9, 151.6, 136.2, 133.3, 131.6, 127.1, 123.1, 28.5, 22.7. HRMS (ESI)  $m/z$  calculated for  $\text{C}_{11}\text{H}_{11}\text{O}_3$   $[\text{M}+\text{H}]^+$  191.0703, found: 191.0699.

### 4-benzylisobenzofuran-1,3-dione (2e)<sup>5</sup>

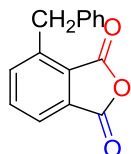

16.7 mg, 70% (isolated yield), white solid, mp 176.5-177.0 °C,  $R_f = 0.17$  (hexane/EtOAc/HOAc = 100/1/1).  $^1\text{H NMR}$  (600 MHz,  $\text{CDCl}_3$ ):  $\delta$  [ppm] = 7.86 (d,  $J = 7.4$  Hz, 1H), 7.76 (t,  $J = 7.6$  Hz, 1H), 7.62 (d,  $J = 7.7$  Hz, 1H), 7.32 (t,  $J = 7.5$  Hz, 2H), 7.25 (d,  $J = 18.3$  Hz, 3H), 4.49 (s, 2H).  $^{13}\text{C}\{^1\text{H}\}$  NMR (150 MHz,  $\text{CDCl}_3$ ):  $\delta$  [ppm] = 163.1, 162.8, 143.5, 138.2, 137.3, 136.0, 131.7, 129.1, 128.9, 128.0, 126.9, 123.7, 36.7. HRMS (APCI)  $m/z$  calculated for  $\text{C}_{15}\text{H}_{11}\text{O}_3$   $[\text{M}+\text{H}]^+$  239.0703, found: 239.0704.

#### 4-phenethylisobenzofuran-1,3-dione (2f)<sup>6</sup>

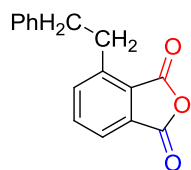

14.1 mg, 56% (isolated yield), white solid, mp 175.3-176.2 °C,  $R_f$  = 0.17 (hexane/EtOAc/HOAc = 100/1/1). <sup>1</sup>H NMR (600 MHz, CDCl<sub>3</sub>):  $\delta$  [ppm] = 7.86 (d,  $J$  = 7.4 Hz, 1H), 7.74 (t,  $J$  = 7.6 Hz, 1H), 7.56 (d,  $J$  = 7.6 Hz, 1H), 7.28 (t,  $J$  = 7.4 Hz, 2H), 7.24 – 7.17 (m, 3H), 3.40 (t, 2H), 2.98 (t, 2H). <sup>13</sup>C{<sup>1</sup>H} NMR (100 MHz, CDCl<sub>3</sub>):  $\delta$  [ppm] = 162.9, 162.8, 144.1, 140.2, 137.2, 135.7, 131.8, 128.5, 128.5, 128.2, 126.4, 123.6, 36.8, 33.6. HRMS (APCI)  $m/z$  calculated for C<sub>16</sub>H<sub>13</sub>O<sub>3</sub> [M+H]<sup>+</sup> 253.0859, found: 253.0858.

#### 4-chloroisobenzofuran-1,3-dione (2g)<sup>7</sup>

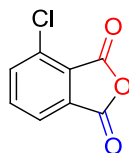

9.1 mg, 50% (isolated yield), yellow solid, mp 145.9-146.3 °C,  $R_f$  = 0.14 (hexane/EtOAc/HOAc = 30/1/1). <sup>1</sup>H NMR (600 MHz, CDCl<sub>3</sub>):  $\delta$  [ppm] = 7.94 (t,  $J$  = 4.2 Hz, 1H), 7.84 (d,  $J$  = 4.1 Hz, 2H). <sup>13</sup>C{<sup>1</sup>H} NMR (150 MHz, CDCl<sub>3</sub>):  $\delta$  [ppm] = 161.3, 159.8, 137.4, 137.0, 133.7, 133.2, 127.6, 124.1. HRMS (APCI)  $m/z$  calculated for C<sub>8</sub>H<sub>4</sub>ClO<sub>3</sub> [M+H]<sup>+</sup> 182.9843, found: 182.9845.

#### 5-methylisobenzofuran-1,3-dione (2h)<sup>8</sup>

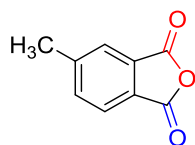

8.1 mg, 50% (isolated yield), white solid, mp 109.7-110.4 °C,  $R_f$  = 0.19 (hexane/EtOAc/HOAc = 10/1/0.05). <sup>1</sup>H NMR (600 MHz, CDCl<sub>3</sub>):  $\delta$  [ppm] = 7.88 (d,  $J$  = 7.1 Hz, 1H), 7.79 (s, 1H), 7.70 (d,  $J$  = 6.8 Hz, 1H), 2.58 (s, 3H). <sup>13</sup>C{<sup>1</sup>H} NMR (150 MHz, CDCl<sub>3</sub>):  $\delta$  [ppm] = 162.9, 162.7, 148.0, 136.9, 131.7, 128.6, 125.9, 125.5, 22.1. HRMS (ESI)  $m/z$  calculated for C<sub>9</sub>H<sub>7</sub>O<sub>3</sub> [M+H]<sup>+</sup> 163.0390, found: 163.0398.

#### 5-methoxyisobenzofuran-1,3-dione (2i)<sup>9</sup>

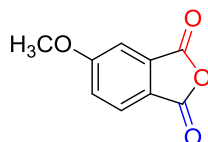

10.0 mg, 56% (isolated yield), white solid, mp 99.9-100.7 °C,  $R_f$  = 0.31 (hexane/EtOAc/HOAc = 5/1/0.05). <sup>1</sup>H NMR (400 MHz, CDCl<sub>3</sub>):  $\delta$  [ppm] = 7.90 (d,  $J$  = 8.5 Hz, 1H), 7.41 (d,  $J$  = 1.9 Hz, 1H), 7.35 (dd,  $J$  = 8.4, 2.0 Hz, 1H), 3.98 (s, 3H). <sup>13</sup>C{<sup>1</sup>H} NMR (150 MHz, CDCl<sub>3</sub>):  $\delta$  [ppm] = 166.1, 163.0, 162.4, 134.1, 127.3, 123.2, 122.9, 108.9, 56.4. HRMS (ESI)  $m/z$  calculated for C<sub>9</sub>H<sub>7</sub>O<sub>4</sub> [M+H]<sup>+</sup> 179.0339, found: 179.0336.

### 5-methylisobenzofuran-1,3-dione (2j)<sup>8</sup>

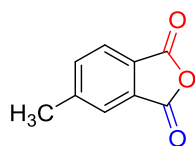

8.9 mg, 55% (isolated yield), white solid, mp 109.7-110.4 °C,  $R_f$  = 0.19 (hexane/EtOAc/HOAc = 10/1/0.05).  $^1\text{H}$  NMR (600 MHz,  $\text{CDCl}_3$ ):  $\delta$  [ppm] = 7.88 (d,  $J$  = 7.1 Hz, 1H), 7.79 (s, 1H), 7.70 (d,  $J$  = 6.8 Hz, 1H), 2.58 (s, 3H).  $^{13}\text{C}\{^1\text{H}\}$  NMR (150 MHz,  $\text{CDCl}_3$ ):  $\delta$  [ppm] = 162.9, 162.7, 147.9, 136.9, 131.7, 128.6, 125.9, 125.5, 22.1. HRMS (ESI)  $m/z$  calculated for  $\text{C}_9\text{H}_7\text{O}_3$   $[\text{M}+\text{H}]^+$  163.0390, found: 163.0398.

### 5-ethylisobenzofuran-1,3-dione (2k)<sup>10</sup>

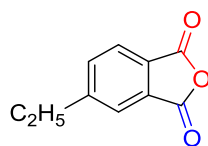

10.7 mg, 61% (isolated yield), white solid, mp 83.5-84.2 °C,  $R_f$  = 0.20 (hexane/EtOAc/HOAc = 10/1/0.05).  $^1\text{H}$  NMR (600 MHz,  $\text{CDCl}_3$ ):  $\delta$  [ppm] = 7.91 (d,  $J$  = 7.8 Hz, 1H), 7.83 (s, 1H), 7.72 (d,  $J$  = 7.8 Hz, 1H), 2.87 (q,  $J$  = 7.6 Hz, 2H), 1.33 (t,  $J$  = 7.6 Hz, 3H).  $^{13}\text{C}\{^1\text{H}\}$  NMR (150 MHz,  $\text{CDCl}_3$ ):  $\delta$  [ppm] = 163.1, 162.8, 154.1, 135.9, 131.8, 128.9, 125.6, 124.8, 29.3, 15.0. HRMS (ESI)  $m/z$  calculated for  $\text{C}_{10}\text{H}_9\text{O}_3$   $[\text{M}+\text{H}]^+$  177.0546, found: 177.0546.

### 5-propylisobenzofuran-1,3-dione (2l)

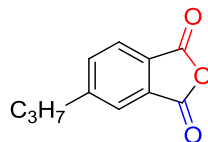

11.4 mg, 60% (isolated yield), white solid, mp 129.8-130.5 °C,  $R_f$  = 0.06 (hexane/EtOAc/HOAc = 4/1/0.05).  $^1\text{H}$  NMR (600 MHz,  $\text{CDCl}_3$ ):  $\delta$  [ppm] = 7.91 (d,  $J$  = 7.8 Hz, 1H), 7.81 (s, 1H), 7.69 (d,  $J$  = 7.8 Hz, 1H), 2.80 (t,  $J$  = 7.6 Hz, 2H), 1.77 – 1.67 (m, 2H), 0.98 (t,  $J$  = 7.3 Hz, 3H).  $^{13}\text{C}\{^1\text{H}\}$  NMR (150 MHz,  $\text{CDCl}_3$ ):  $\delta$  [ppm] = 163.1, 162.8, 152.6, 136.4, 131.7, 128.9, 125.6, 125.3, 38.2, 24.2, 13.6. HRMS (ESI)  $m/z$  calculated for  $\text{C}_{11}\text{H}_{11}\text{O}_3$   $[\text{M}+\text{H}]^+$  191.0703, found: 191.0700.

### 5-(*tert*-butyl)isobenzofuran-1,3-dione (2m)<sup>11</sup>

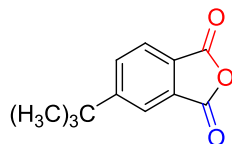

12.9 mg, 63% (isolated yield), colourless liquid,  $R_f$  = 0.06 (hexane/EtOAc/HOAc = 4/1/0.05).  $^1\text{H}$  NMR (400 MHz,  $\text{CDCl}_3$ ):  $\delta$  [ppm] = 8.02 (s, 1H), 7.93 (s, 2H), 1.40 (s, 9H).  $^{13}\text{C}\{^1\text{H}\}$  NMR (100 MHz,  $\text{CDCl}_3$ ):  $\delta$  [ppm] = 163.4, 162.8, 161.2, 133.5, 131.5, 128.5, 125.4, 122.6, 36.0, 31.0.

### 5-methoxyisobenzofuran-1,3-dione (2n)<sup>9</sup>

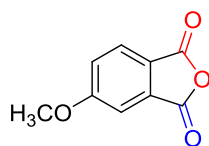

9.1 mg, 51% (isolated yield), white solid, mp 99.9-100.7 °C,  $R_f = 0.31$  (hexane/EtOAc/HOAc = 5/1/0.05). <sup>1</sup>H NMR (400 MHz, CDCl<sub>3</sub>):  $\delta$  [ppm] = 7.90 (d,  $J = 8.5$  Hz, 1H), 7.41 (d,  $J = 1.9$  Hz, 1H), 7.35 (dd,  $J = 8.4, 2.0$  Hz, 1H), 3.98 (s, 3H). <sup>13</sup>C{<sup>1</sup>H} NMR (150 MHz, CDCl<sub>3</sub>):  $\delta$  [ppm] = 166.1, 163.0, 162.4, 134.1, 127.3, 123.2, 122.9, 108.9, 56.4. HRMS (ESI)  $m/z$  calculated for C<sub>9</sub>H<sub>7</sub>O<sub>4</sub> [M+H]<sup>+</sup> 179.0339, found: 179.0336.

### 5-phenylisobenzofuran-1,3-dione (2o)<sup>12</sup>

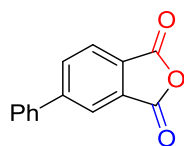

12.1 mg, 54% (isolated yield), white solid, mp 161.9-162.6 °C,  $R_f = 0.34$  (hexane/CH<sub>2</sub>Cl<sub>2</sub>/HOAc = 2/1/0.05). <sup>1</sup>H NMR (400 MHz, CDCl<sub>3</sub>):  $\delta$  [ppm] = 8.20 (s, 1H), 8.09 (q,  $J = 7.9$  Hz, 2H), 7.65 (d,  $J = 7.1$  Hz, 2H), 7.58 – 7.46 (m, 3H). <sup>13</sup>C{<sup>1</sup>H} NMR (100 MHz, CDCl<sub>3</sub>):  $\delta$  [ppm] = 162.9, 162.7, 149.7, 138.1, 134.7, 132.2, 129.6, 129.5, 129.4, 127.5, 126.1, 124.0. HRMS (ESI)  $m/z$  calculated for C<sub>14</sub>H<sub>9</sub>O<sub>3</sub> [M+H]<sup>+</sup> 225.0546, found: 225.0547.

### 4,5-dimethylisobenzofuran-1,3-dione (2p)<sup>13</sup>

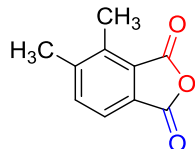

12.3 mg, 70% (isolated yield), white solid, mp 119.7-120.5 °C,  $R_f = 0.16$  (hexane/EtOAc/HOAc = 50/1/0.05). <sup>1</sup>H NMR (600 MHz, CDCl<sub>3</sub>):  $\delta$  [ppm] = 7.73 (d,  $J = 7.6$  Hz, 1H), 7.62 (d,  $J = 7.6$  Hz, 1H), 2.66 (s, 3H), 2.46 (s, 3H). <sup>13</sup>C{<sup>1</sup>H} NMR (100 MHz, CDCl<sub>3</sub>):  $\delta$  [ppm] = 163.6, 162.9, 147.2, 139.3, 136.9, 129.2, 128.6, 122.9, 20.1, 14.2. HRMS (ESI)  $m/z$  calculated for C<sub>10</sub>H<sub>9</sub>O<sub>3</sub> [M+H]<sup>+</sup> 177.0546, found: 177.0550.

### 5-methoxy-4-methylisobenzofuran-1,3-dione (2q)<sup>14</sup>

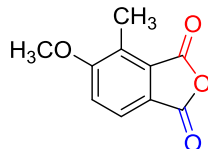

11.3 mg, 59% (isolated yield), white solid, mp 128.2-129.0 °C,  $R_f = 0.06$  (hexane/EtOAc/HOAc = 100/1/0.5). <sup>1</sup>H NMR (400 MHz, CDCl<sub>3</sub>):  $\delta$  [ppm] = 7.82 (d,  $J = 8.3$  Hz, 1H), 7.21 (d,  $J = 8.3$  Hz, 1H), 3.99 (s, 3H), 2.55 (s, 3H). <sup>13</sup>C{<sup>1</sup>H} NMR (100 MHz, CDCl<sub>3</sub>):  $\delta$  [ppm] = 164.1, 163.3, 162.7, 129.9, 129.6, 125.1, 122.2, 115.8, 56.6, 10.8. HRMS (ESI)  $m/z$  calculated for C<sub>10</sub>H<sub>9</sub>O<sub>4</sub> [M+H]<sup>+</sup> 193.0495, found: 193.0496.

#### 4-ethyl-5-methoxyisobenzofuran-1,3-dione (2r)

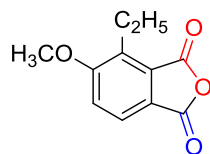

12.8 mg, 62% (isolated yield), yellow solid, mp 118.2-119.0 °C,  $R_f$  = 0.09 (hexane/EtOAc/HOAc = 100/1/0.5).  $^1\text{H}$  NMR (400 MHz,  $\text{CDCl}_3$ ):  $\delta$  [ppm] = 7.82 (d,  $J$  = 8.4 Hz, 1H), 7.23 (d,  $J$  = 8.3 Hz, 1H), 3.99 (s, 3H), 3.09 (q,  $J$  = 7.5 Hz, 2H), 1.18 (t,  $J$  = 7.5 Hz, 3H).  $^{13}\text{C}\{^1\text{H}\}$  NMR (100 MHz,  $\text{CDCl}_3$ ):  $\delta$  [ppm] = 163.7, 163.0, 162.7, 135.7, 129.4, 125.2, 122.4, 116.3, 56.6, 18.4, 13.7. HRMS (APCI)  $m/z$  calculated for  $\text{C}_{11}\text{H}_{11}\text{O}_4$   $[\text{M}+\text{H}]^+$  207.0652, found: 207.0649.

#### 5-chloro-4-methylisobenzofuran-1,3-dione (2s)

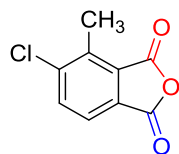

12.9 mg, 66% (isolated yield), white solid, mp 129.7-130.4 °C,  $R_f$  = 0.46 (hexane/ $\text{CH}_2\text{Cl}_2$ /HOAc = 2/1/0.05).  $^1\text{H}$  NMR (600 MHz,  $\text{CDCl}_3$ ):  $\delta$  [ppm] = 7.85 (d,  $J$  = 8.0 Hz, 1H), 7.79 (d,  $J$  = 8.0 Hz, 1H), 2.78 (s, 3H).  $^{13}\text{C}\{^1\text{H}\}$  NMR (100 MHz,  $\text{CDCl}_3$ ):  $\delta$  [ppm] = 162.2, 161.8, 143.8, 138.8, 136.4, 130.0, 129.6, 123.8, 14.8. HRMS (APCI)  $m/z$  calculated for  $\text{C}_9\text{H}_6\text{ClO}_3$   $[\text{M}+\text{H}]^+$  197.0000, found: 197.0001.

#### 4,5-dimethoxyisobenzofuran-1,3-dione (2t)<sup>15</sup>

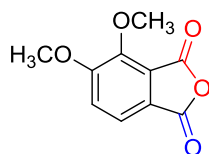

11.4 mg, 55% (isolated yield), yellow solid, mp 170.0-170.9 °C,  $R_f$  = 0.09 (hexane/EtOAc/HOAc = 50/1/1).  $^1\text{H}$  NMR (400 MHz,  $\text{CDCl}_3$ ):  $\delta$  [ppm] = 7.68 (d,  $J$  = 8.2 Hz, 1H), 7.28 (d,  $J$  = 8.2 Hz, 1H), 4.22 (s, 3H), 4.00 (s, 3H).  $^{13}\text{C}\{^1\text{H}\}$  NMR (150 MHz,  $\text{CDCl}_3$ ):  $\delta$  [ppm] = 162.4, 160.7, 158.6, 148.6, 123.1, 121.5, 120.5, 118.2, 62.7, 56.9. HRMS (ESI)  $m/z$  calculated for  $\text{C}_{10}\text{H}_9\text{O}_5$   $[\text{M}+\text{H}]^+$  209.0444, found: 209.0449.

#### 4,6-dimethylisobenzofuran-1,3-dione (2u)<sup>16</sup>

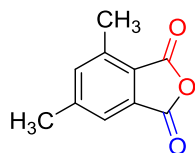

9.7 mg, 55% (isolated yield), white solid, mp 129.8-130.6 °C,  $R_f$  = 0.19 (hexane/EtOAc/HOAc = 50/1/0.05).  $^1\text{H}$  NMR (600 MHz,  $\text{CDCl}_3$ ):  $\delta$  [ppm] = 7.61 (s, 1H), 7.44 (s, 1H), 2.67 (s, 3H), 2.52 (s, 3H).  $^{13}\text{C}\{^1\text{H}\}$  NMR (100 MHz,  $\text{CDCl}_3$ ):  $\delta$  [ppm] = 163.3, 163.1, 147.5, 140.1, 138.6, 132.0, 125.9, 123.7, 22.0, 17.6. HRMS (ESI)  $m/z$  calculated for  $\text{C}_{10}\text{H}_9\text{O}_3$   $[\text{M}+\text{H}]^+$  177.0546, found: 177.0542.

### 5,6-dimethoxyisobenzofuran-1,3-dione (2v)<sup>15</sup>

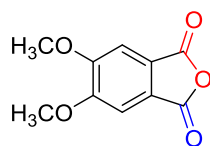

12.3 mg, 59% (isolated yield), white solid, mp 193.3-194.5 °C,  $R_f = 0.07$  (hexane/EtOAc/HOAc = 50/1/1).  $^1\text{H NMR}$  (400 MHz,  $\text{CDCl}_3$ ):  $\delta$  [ppm] = 7.36 (s, 2H), 4.03 (s, 6H).  $^{13}\text{C}\{^1\text{H}\}$  NMR (100 MHz,  $\text{CDCl}_3$ ):  $\delta$  [ppm] = 163.1, 155.8, 124.9, 106.1, 56.9. HRMS (ESI)  $m/z$  calculated for  $\text{C}_{10}\text{H}_9\text{O}_5$   $[\text{M}+\text{H}]^+$  209.0444, found: 209.0444.

### [1,3]dioxolo[4,5-f]isobenzofuran-5,7-dione (2w)<sup>17</sup>

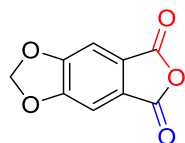

15.4 mg, 80% (isolated yield), white solid, mp 186.3-187.1 °C,  $R_f = 0.12$  (hexane/EtOAc/HOAc = 50/1/0.5).  $^1\text{H NMR}$  (600 MHz,  $\text{CDCl}_3$ ):  $\delta$  [ppm] = 7.28 (s, 2H), 6.26 (s, 2H).  $^{13}\text{C}\{^1\text{H}\}$  NMR (150 MHz,  $\text{CDCl}_3$ ):  $\delta$  [ppm] = 162.3, 154.7, 127.1, 104.7, 103.9. HRMS (ESI)  $m/z$  calculated for  $\text{C}_9\text{H}_5\text{O}_5$   $[\text{M}+\text{H}]^+$  193.0131, found: 193.0126.

### 4,6-dimethylisobenzofuran-1,3-dione (2x)<sup>16</sup>

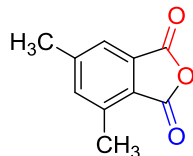

9.9 mg, 56% (isolated yield), white solid, mp 129.8-130.6 °C,  $R_f = 0.19$  (hexane/EtOAc/HOAc = 50/1/0.05).  $^1\text{H NMR}$  (600 MHz,  $\text{CDCl}_3$ ):  $\delta$  [ppm] = 7.61 (s, 1H), 7.44 (s, 1H), 2.67 (s, 3H), 2.52 (s, 3H).  $^{13}\text{C}\{^1\text{H}\}$  NMR (100 MHz,  $\text{CDCl}_3$ ):  $\delta$  [ppm] = 163.3, 163.1, 147.5, 140.1, 138.6, 131.9, 125.9, 123.7, 22.0, 17.6. HRMS (ESI)  $m/z$  calculated for  $\text{C}_{10}\text{H}_9\text{O}_3$   $[\text{M}+\text{H}]^+$  177.0546, found: 177.0542.

### 4,7-dimethylisobenzofuran-1,3-dione (2y)<sup>18</sup>

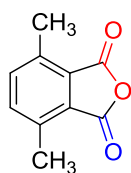

10.2 mg, 58% (isolated yield), white solid, mp 163.6-164.4 °C,  $R_f = 0.23$  (hexane/EtOAc/HOAc = 50/1/0.05).  $^1\text{H NMR}$  (400 MHz,  $\text{CDCl}_3$ ):  $\delta$  [ppm] = 7.50 (s, 2H), 2.67 (s, 6H).  $^{13}\text{C}\{^1\text{H}\}$  NMR (100 MHz,  $\text{CDCl}_3$ ):  $\delta$  [ppm] = 163.3, 137.8, 137.7, 128.5, 17.4. HRMS (ESI)  $m/z$  calculated for  $\text{C}_{10}\text{H}_9\text{O}_3$   $[\text{M}+\text{H}]^+$  177.0546, found: 177.0548.

## VIII. References

- 1 R. Giri and J. Q. Yu, Synthesis of 1,2- and 1,3-dicarboxylic acids via Pd(II)-catalyzed carboxylation of aryl and vinyl C-H bonds, *J. Am. Chem. Soc.*, 2008, **130**, 14082.
- 2 Y. Zhang, J. Jiao and R. A. Flowers, Mild conversion of  $\beta$ -diketone and  $\beta$ -ketoesters to carboxylic acids, *J. Org. Chem.*, 2006, **71**, 4516.
- 3 K. Ghosh, R. Karmakar and D. Mal, Total synthesis of neo-tanshinlactones through a cascade benzannulation-lactonization as the key step, *Eur. J. Org. Chem.*, 2013, **2013**, 4037.
- 4 R. B. Brundrett and E. H. White, Synthesis and chemiluminescence of derivatives of luminol and isoluminol, *J. Am. Chem. Soc.*, 1974, **96**, 7497.
- 5 L. Mavoungou-Gomes, Naphtho[2,3-b]furans, *Comptes Rendus des Seances de l'Academie des Sciences, Serie C: Sciences Chimiques*, 1970, **270**, 750.
- 6 L. Mavoungou-Gomes, Synthesis of new heterocyclic systems. Derivatives of 5-H-dibenzo[a, d]cycloheptene, *Comptes Rendus des Seances de l'Academie des Sciences, Serie C: Sciences Chimiques*, 1972, **274**, 73.
- 7 C. Soucy, The regioselectivity of metal hydride reductions of 3-substituted phthalic anhydrides, *J. Org. Chem.*, 1987, **52**, 129.
- 8 P. Nandhikonda and M. D. Heagy, Dual fluorescent N-aryl-2,3-naphthalimides: applications in ratiometric DNA detection and white organic light-emitting devices, *Org. Lett.*, 2010, **12**, 4796.
- 9 T. K. Kim, J. E. Kim, U. J. Youn, S. J. Han, I. C. Kim, C. G. Cho and J. H. Yim, Total syntheses of lobaric acid and its derivatives from the antarctic lichen stereocaulon alpinum, *J. Nat. Prod.*, 2018, **81**, 1460.
- 10 A. C. Estrada, M. M. Q. Simões, I. C. M. S. Santos, M. G. P. M. S. Neves, J. A. S. Cavaleiro and A. M. V. Cavaleiro, Oxidation of polycyclic aromatic hydrocarbons with hydrogen peroxide in the presence of transition metal mono-substituted Keggin-Type polyoxometalates, *ChemCatChem*, 2011, **3**, 771.
- 11 K. J. Liu, Y. L. Fu, L. Y. Xie, C. Wu, W. B. He, S. Peng, Z. Wang, W. H. Bao, Z. Cao, X. H. Xu and W. M. He, Green and efficient: oxidation of aldehydes to carboxylic acids and acid anhydrides with air, *ACS Sustainable Chem. Eng.*, 2018, **6**, 4916.
- 12 V. Georgian and J. Lepe M., Alicyclic syntheses. I. The Diels-Alder reaction of 2-phenyl-butadiene with citraconic anhydride and 5-p-tolylthiitoluquinone, *J. Org. Chem.*, 1964, **29**, 40.
- 13 Q. Liao, Q. Kang, Y. Yang, C. An, B. Xu and J. Hou, Tailoring and modifying an organic electron acceptor toward the cathode interlayer for highly efficient organic solar cells, *Adv. Mater.*, 2020, **32**, 1906557.
- 14 W. Metlesics, Dimerization of 2-methyl-o-quinol acetate, *Monatsh. Chem.*, 1957, **88**, 108.
- 15 N. Kise, S. Yamamoto and T. Sakurai, Electroreductive coupling of phthalic anhydrides with  $\alpha,\beta$ -unsaturated carbonyl compounds: synthesis of 1,4-dihydroxynaphthalenes, *J. Org. Chem.*, 2020, **85**, 13973.
- 16 P. Y. Blanc, Some diene enol esters and their application in a general synthesis of substituted phthalic anhydrides, *Helv. Chim. Acta*, 1961, **44**, 1.
- 17 W. Reeve, The synthesis of hydrastic acid, *J. Am. Chem. Soc.*, 1951, **73**, 1371.
- 18 B. A. Abel, C. A. L. Lidston and G. W. Coates, Mechanism-inspired design of bifunctional catalysts for the alternating ring-opening copolymerization of epoxides and cyclic anhydrides, *J. Am. Chem. Soc.*, 2019, **141**, 12760.



## IX. Copies of NMR spectra

### <sup>1</sup>H NMR spectra of compound 2a

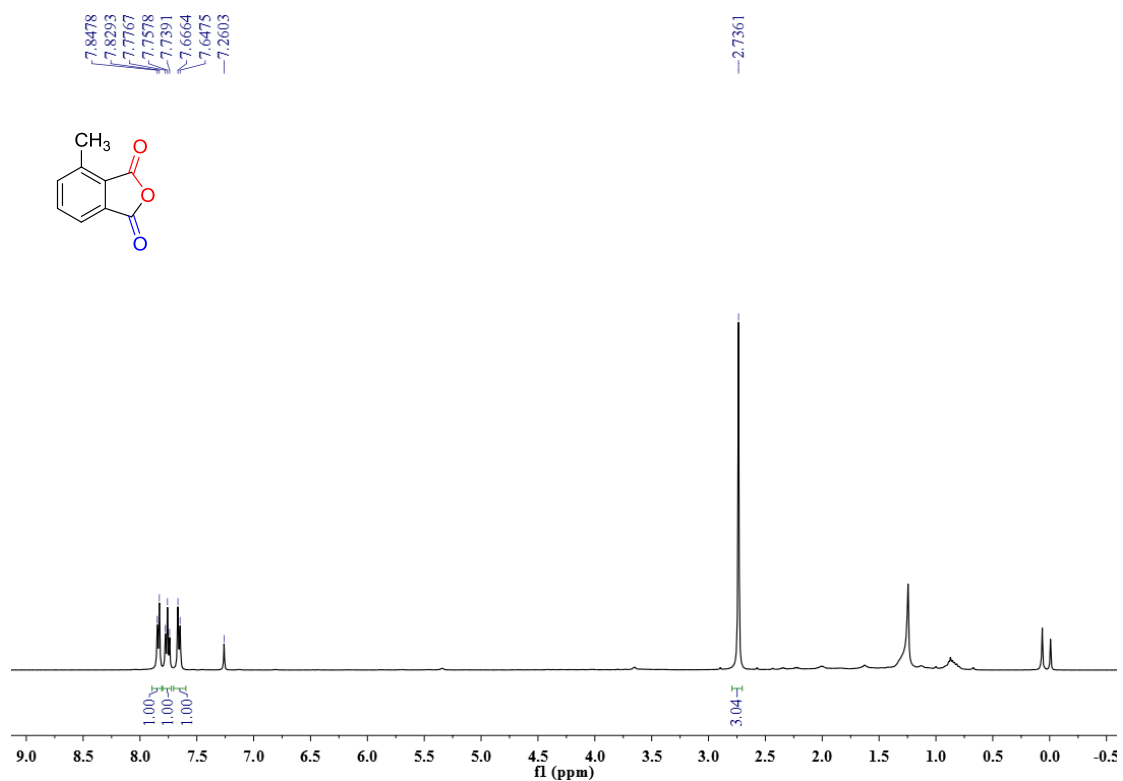

### <sup>13</sup>C NMR spectra of compound 2a

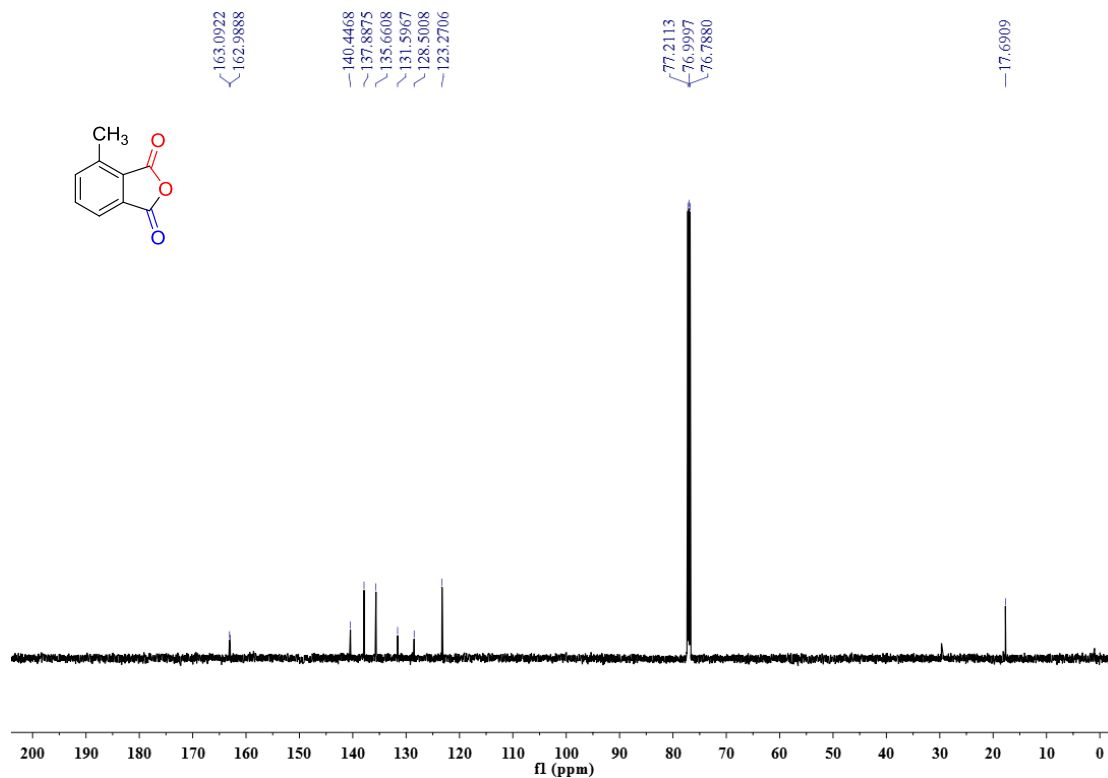

### <sup>1</sup>H NMR spectra of compound 2b

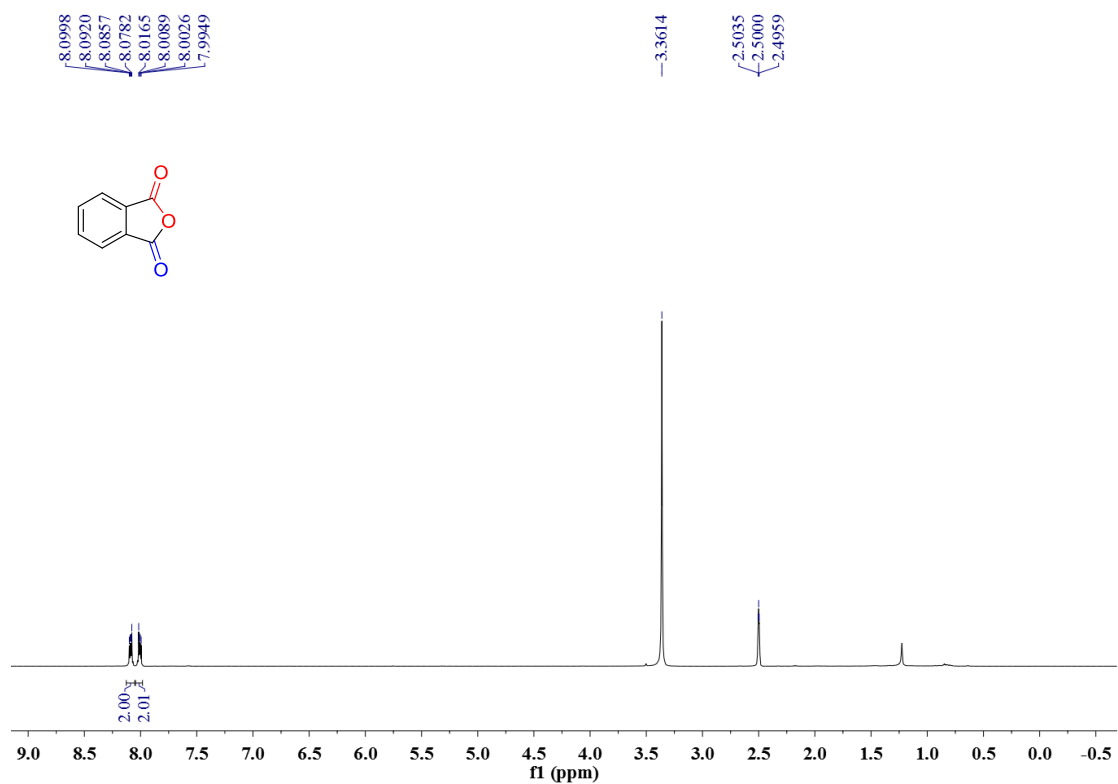

### <sup>13</sup>C NMR spectra of compound 2b

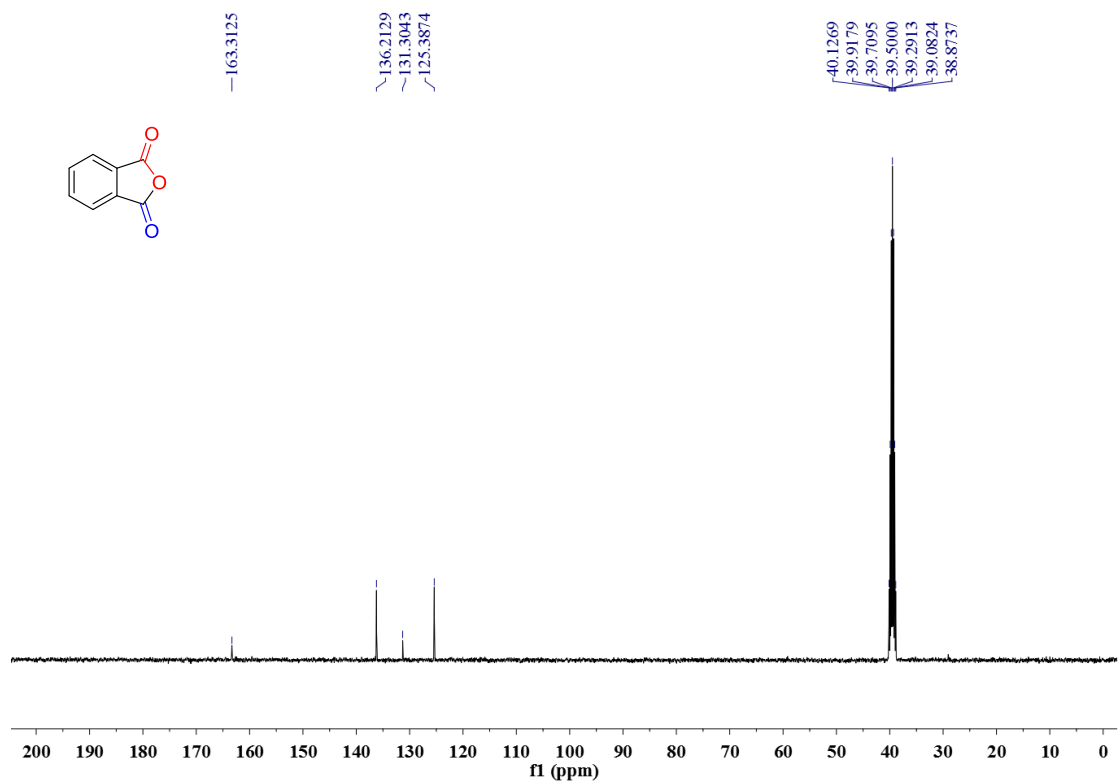

### <sup>1</sup>H NMR spectra of compound 2c

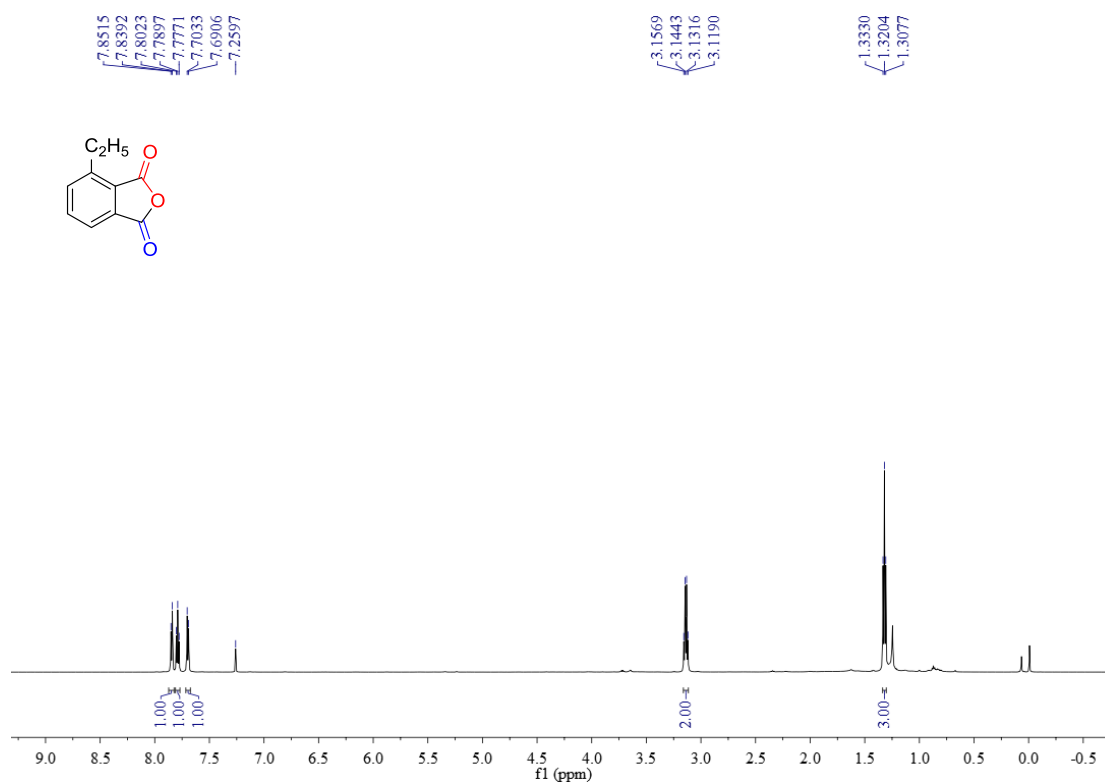

### <sup>13</sup>C NMR spectra of compound 2c

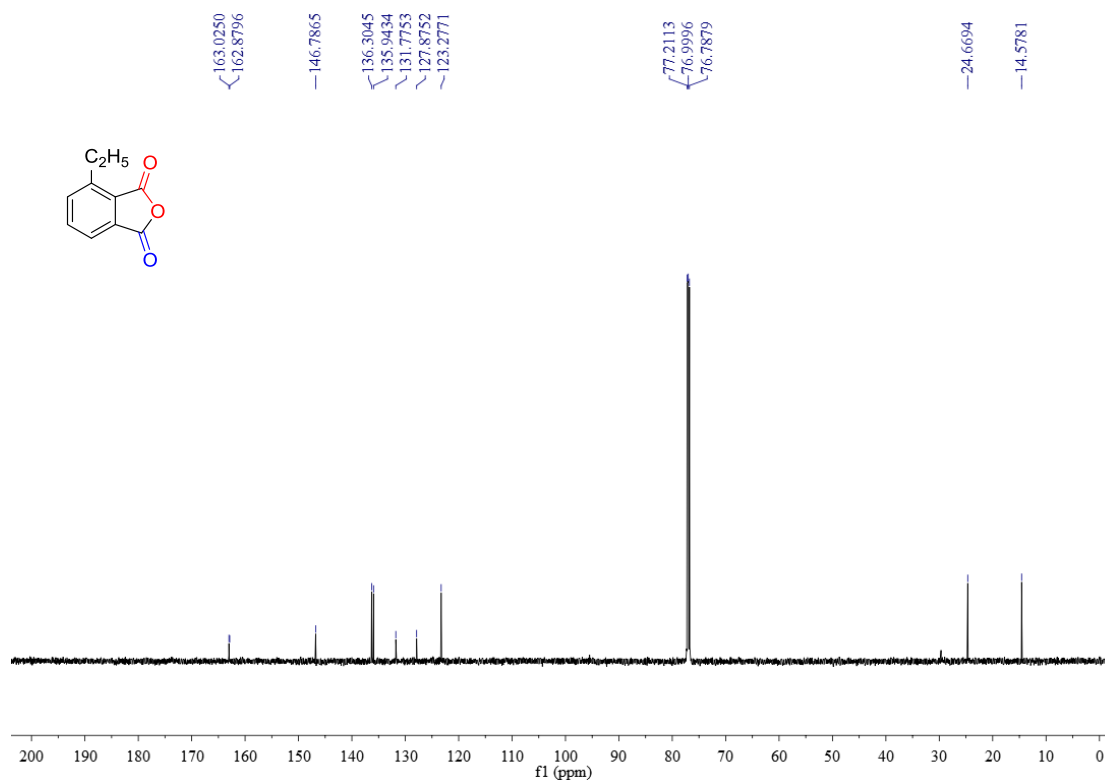

## <sup>1</sup>H NMR spectra of compound 2d

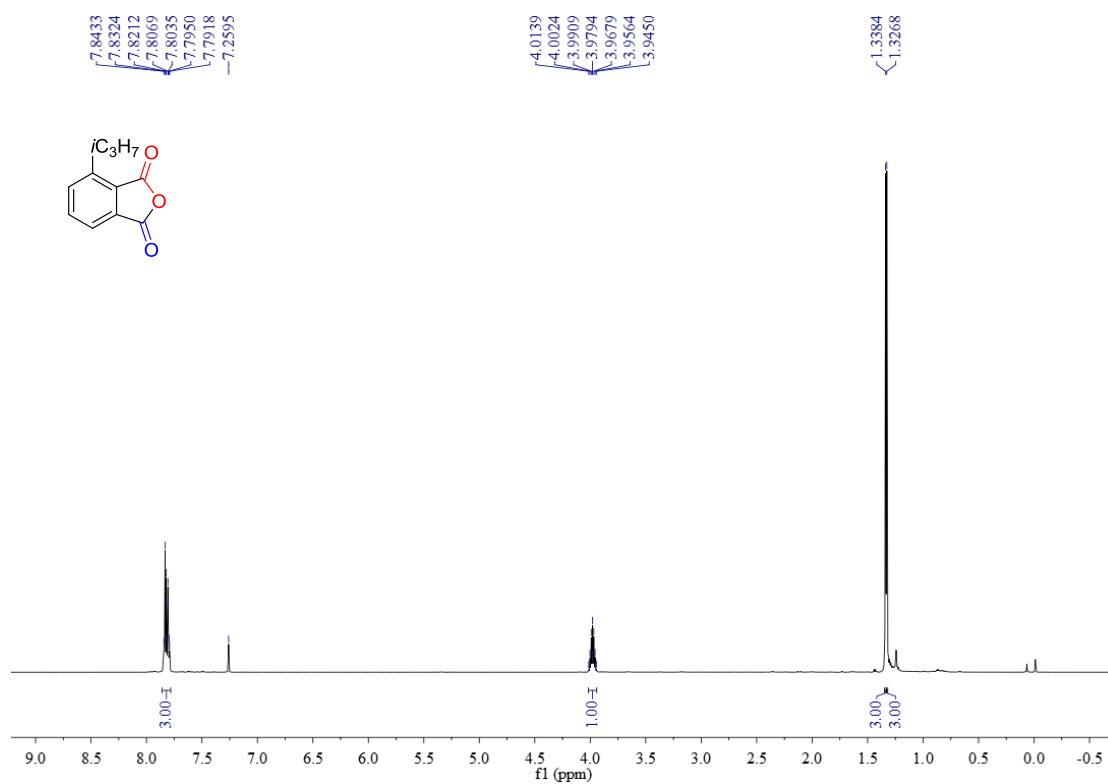

## <sup>13</sup>C NMR spectra of compound 2d

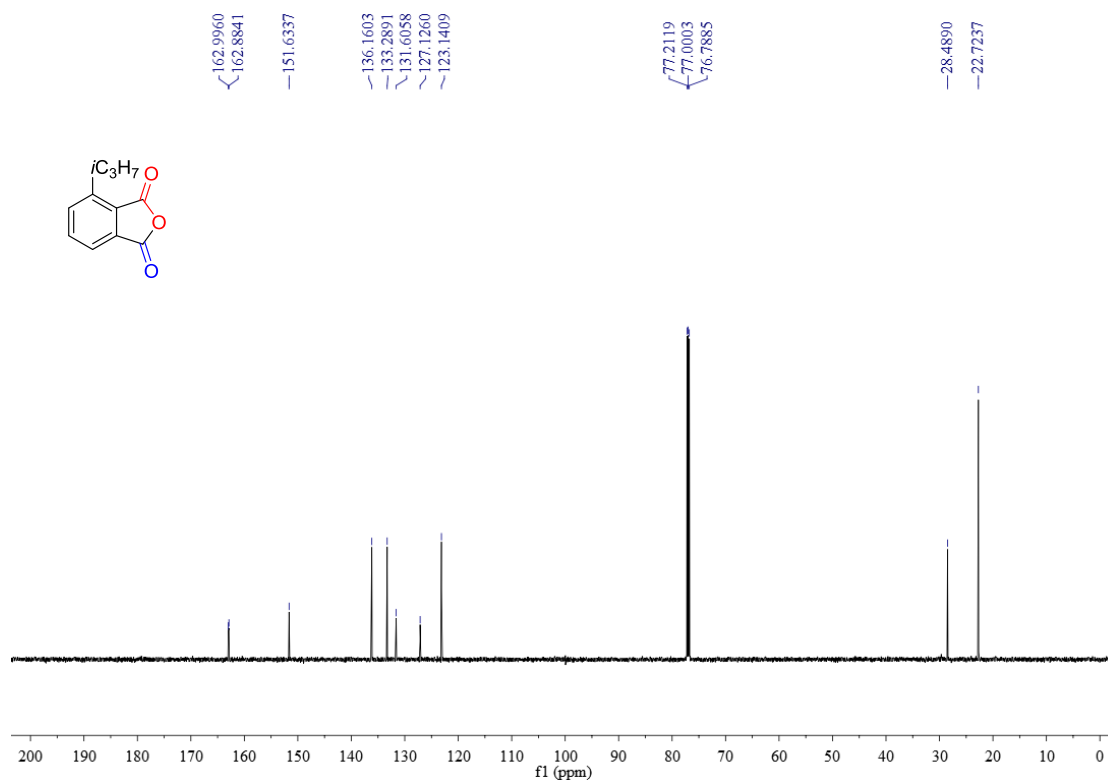

## <sup>1</sup>H NMR spectra of compound 2e

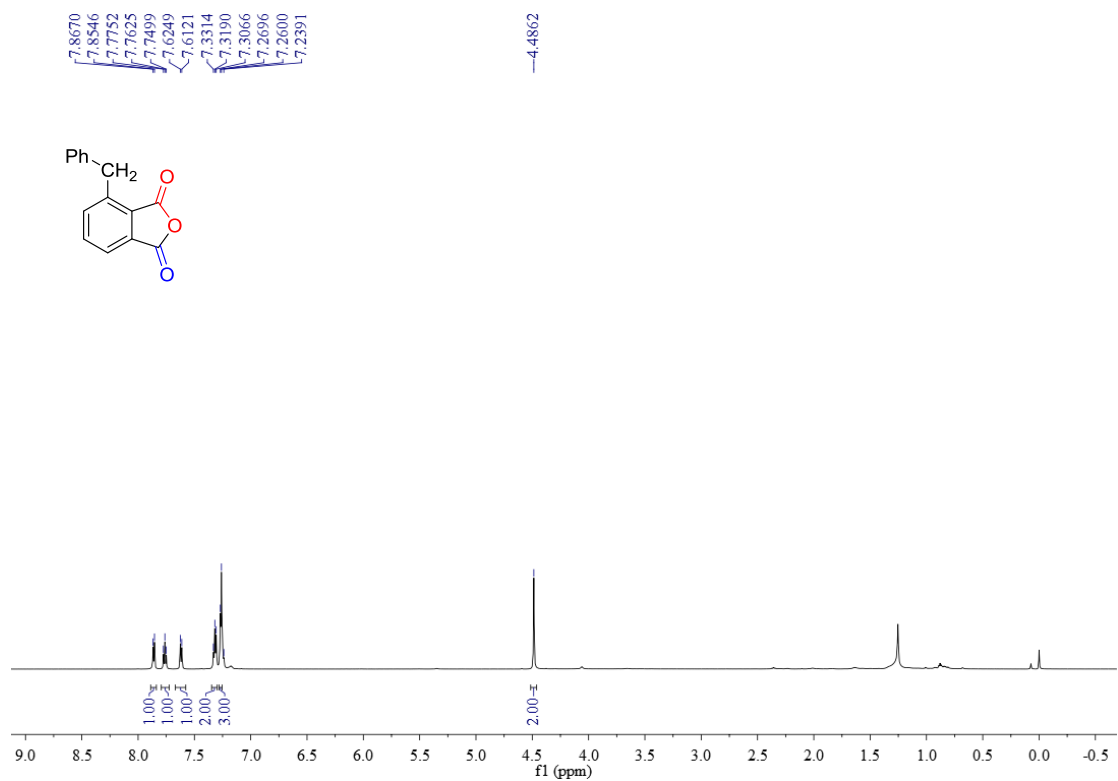

## <sup>13</sup>C NMR spectra of compound 2e

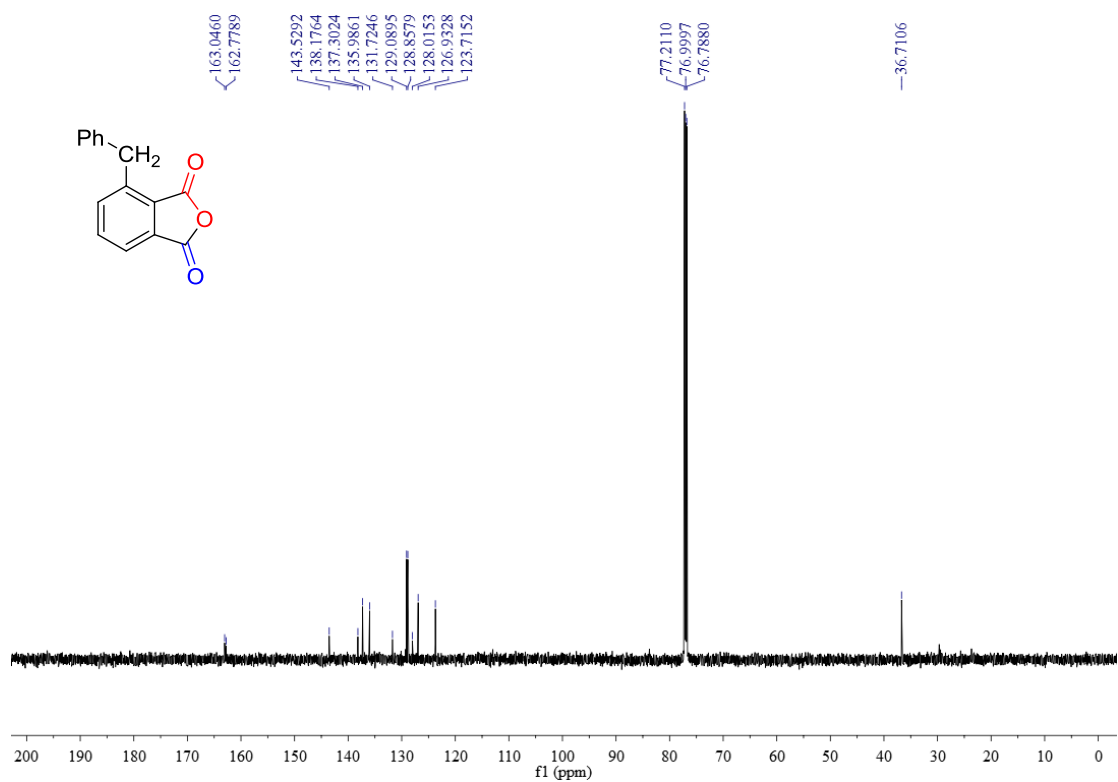

# <sup>1</sup>H NMR spectra of compound 2f

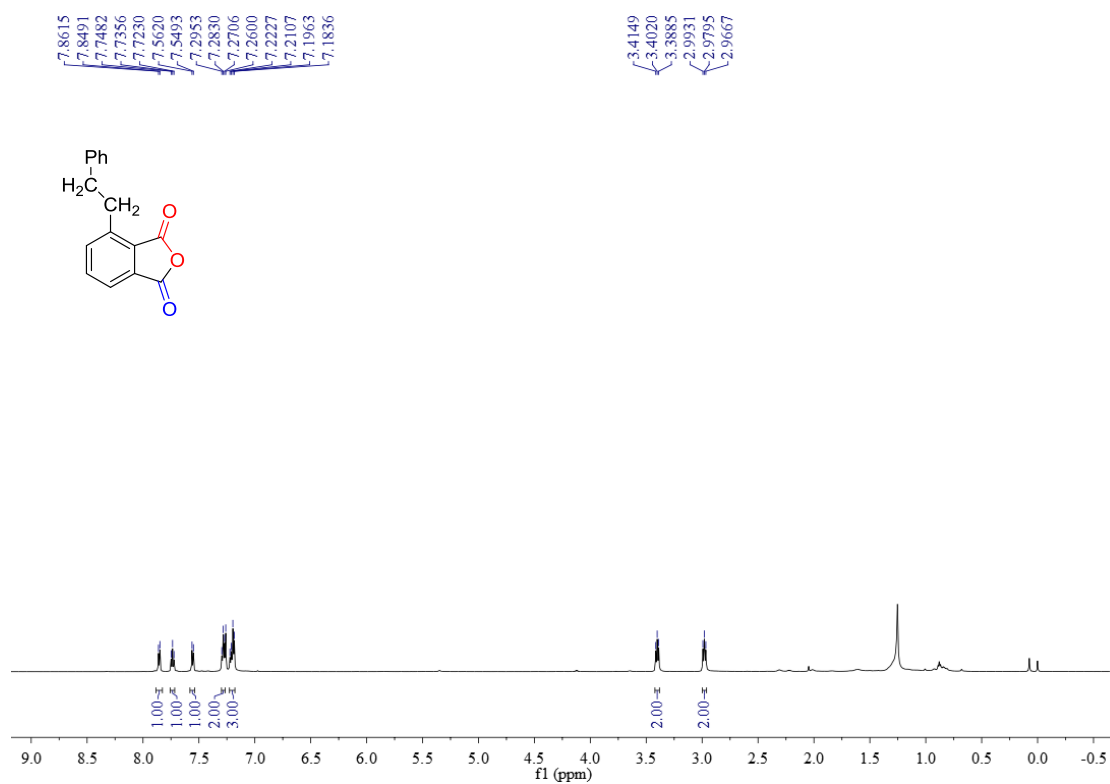

# <sup>13</sup>C NMR spectra of compound 2f

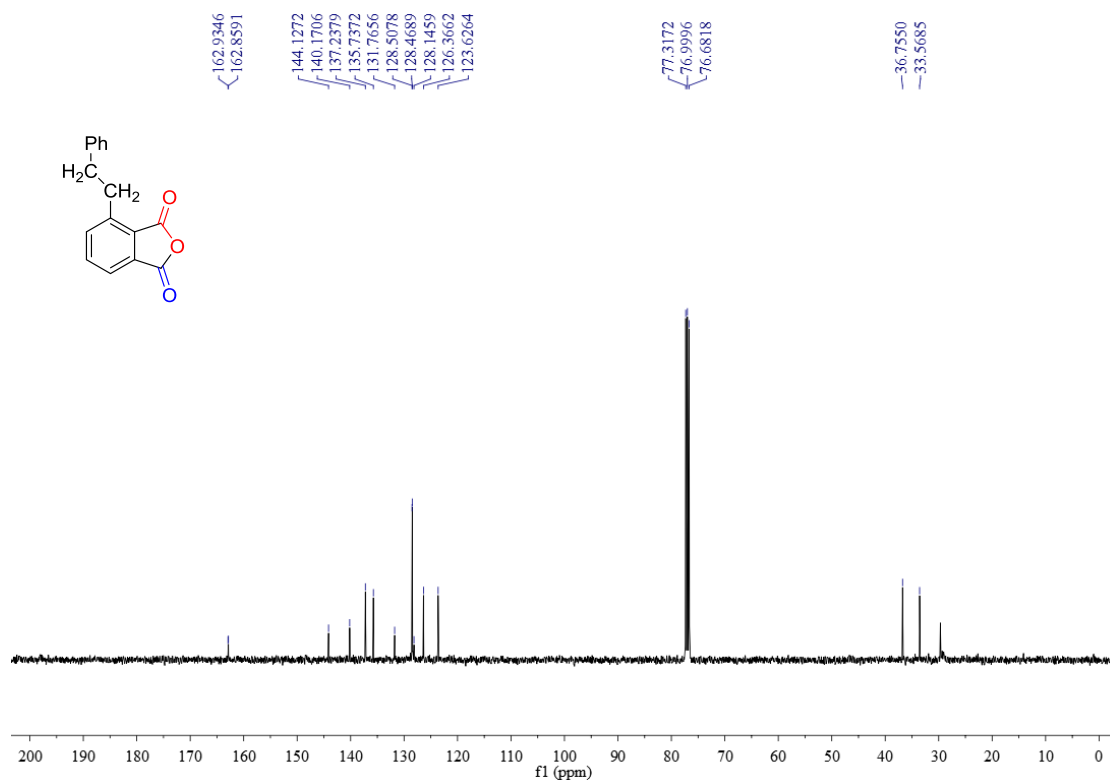

### <sup>1</sup>H NMR spectra of compound 2g

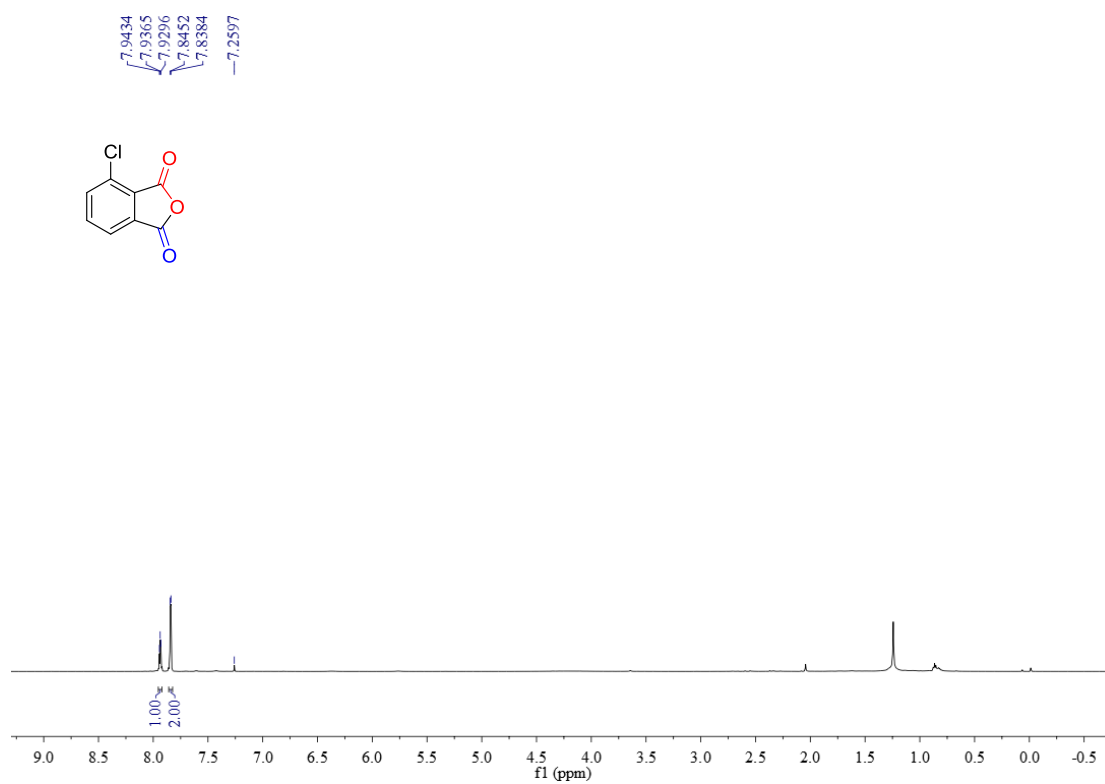

### <sup>13</sup>C NMR spectra of compound 2g

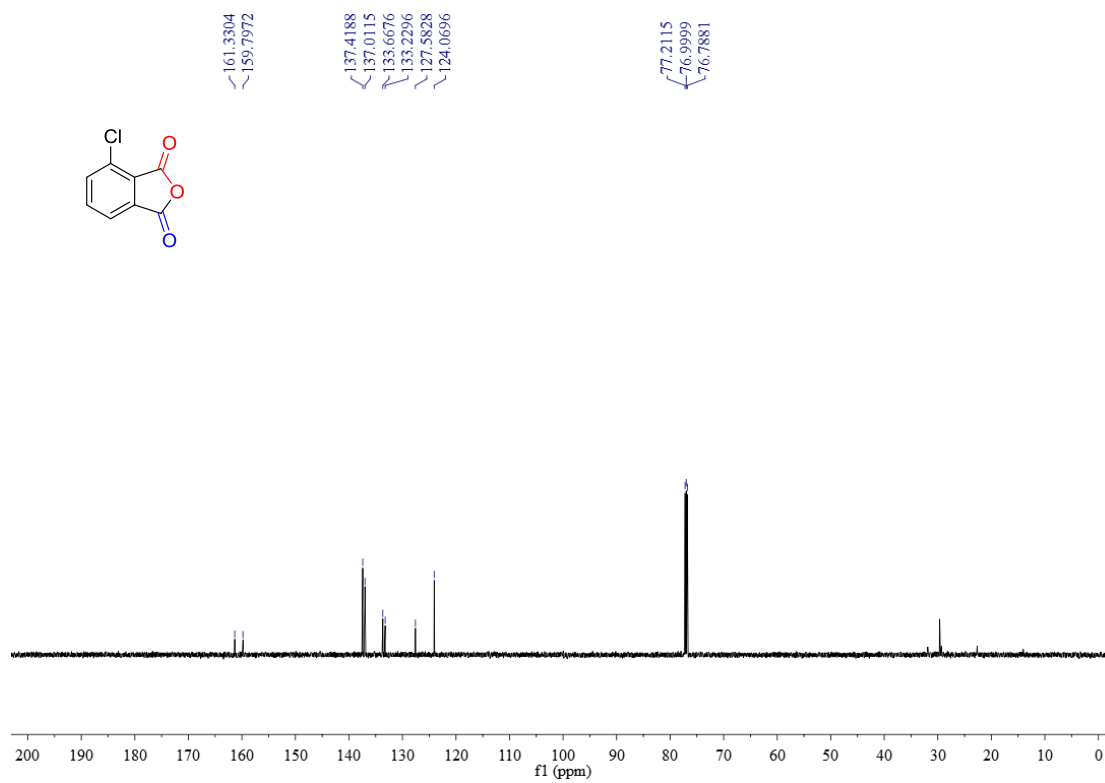

### <sup>1</sup>H NMR spectra of compound 2h

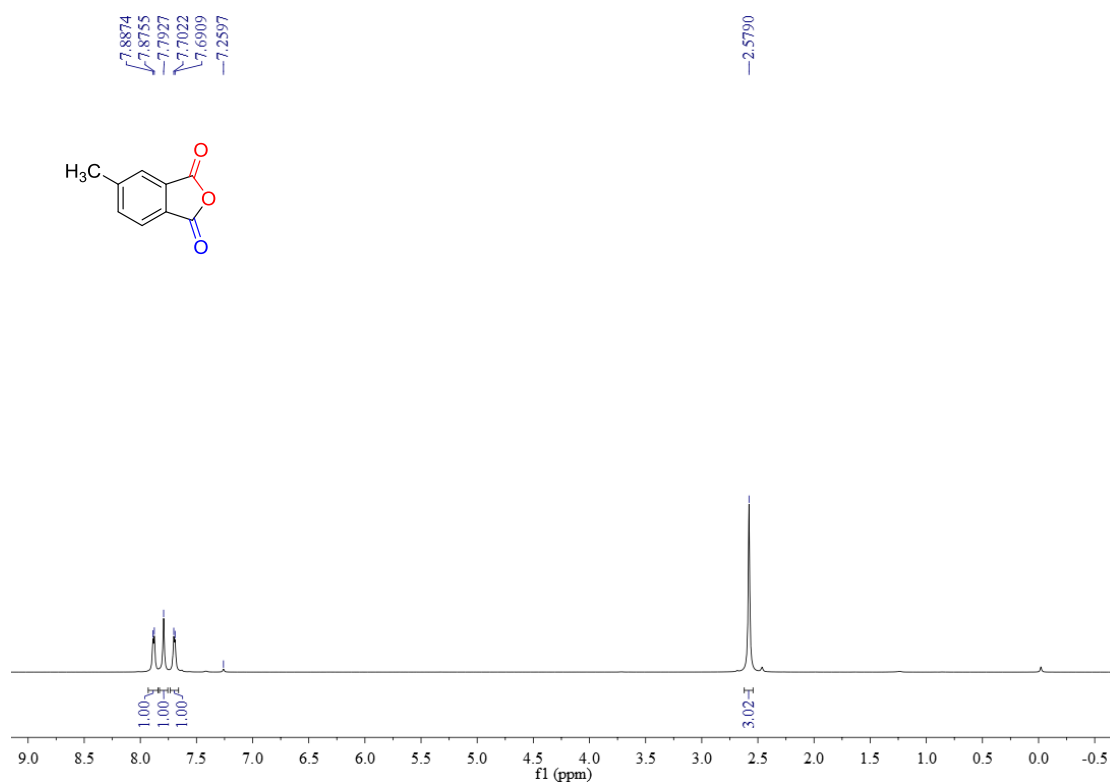

### <sup>13</sup>C NMR spectra of compound 2h

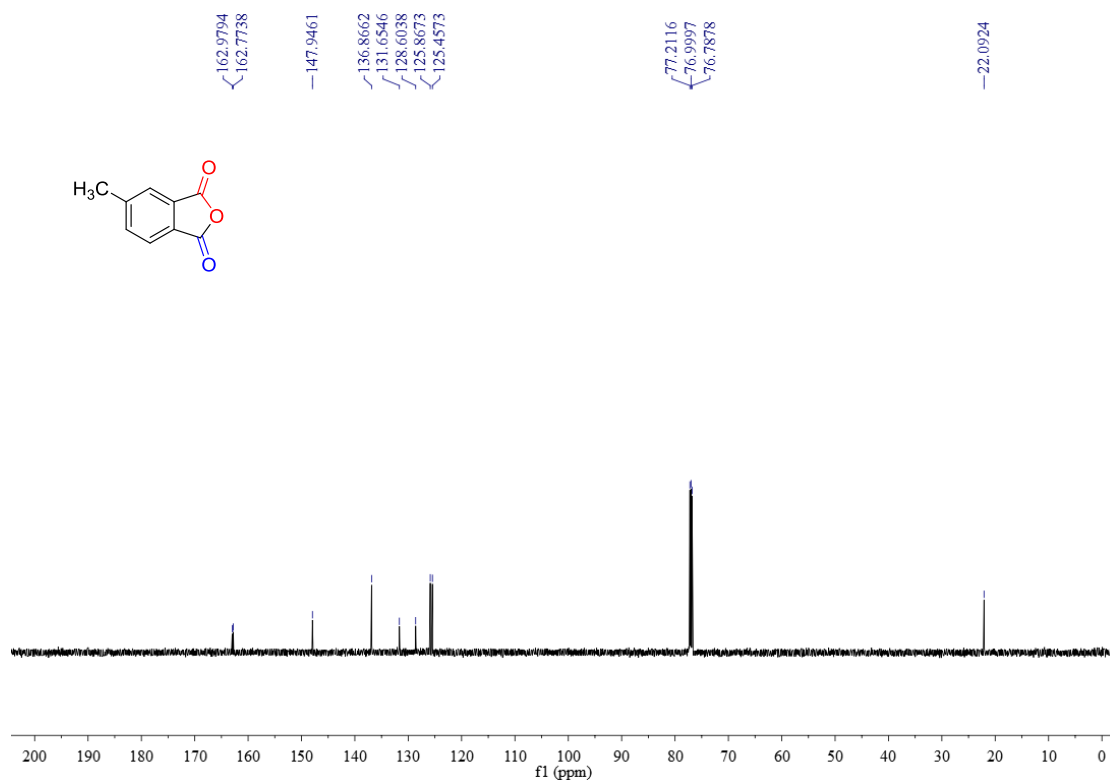



## <sup>1</sup>H NMR spectra of compound 2i

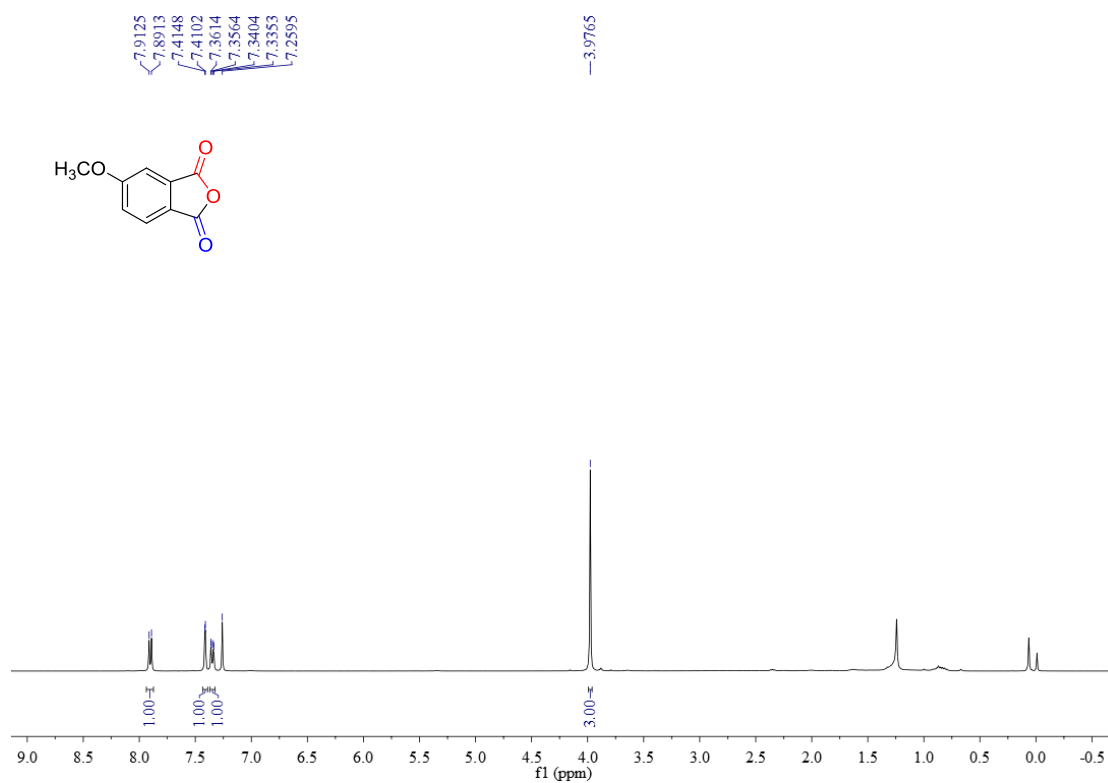

## <sup>13</sup>C NMR spectra of compound 2i

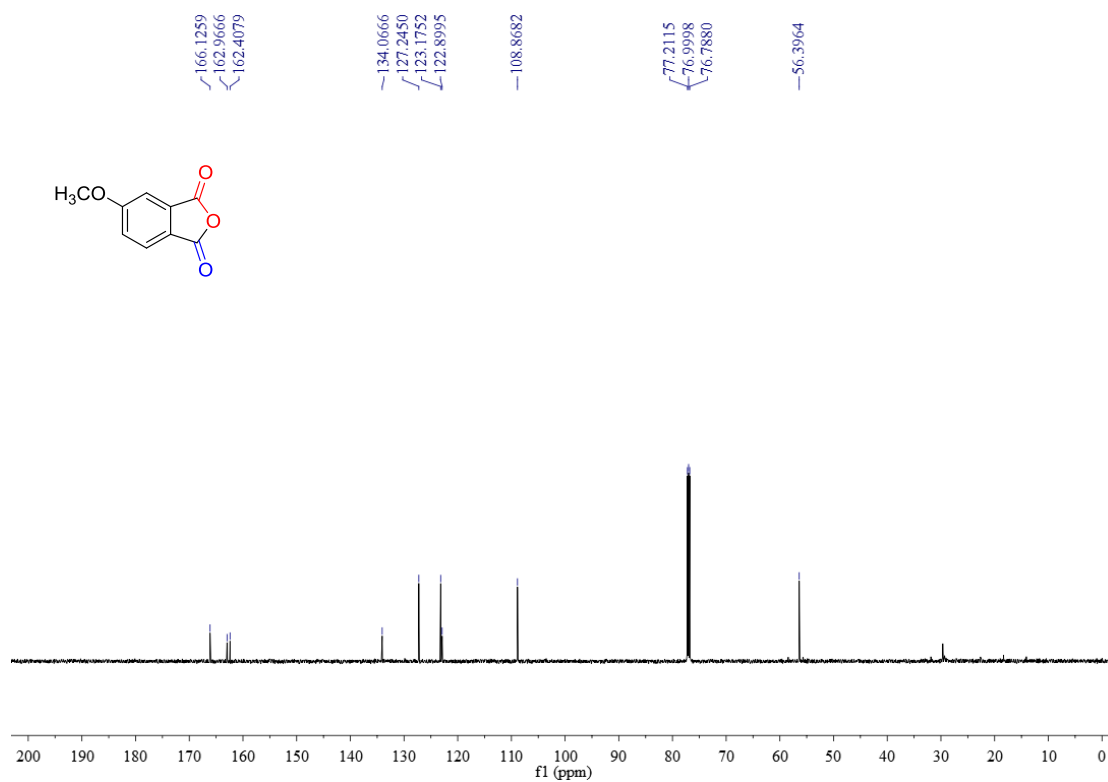

### <sup>1</sup>H NMR spectra of compound 2j

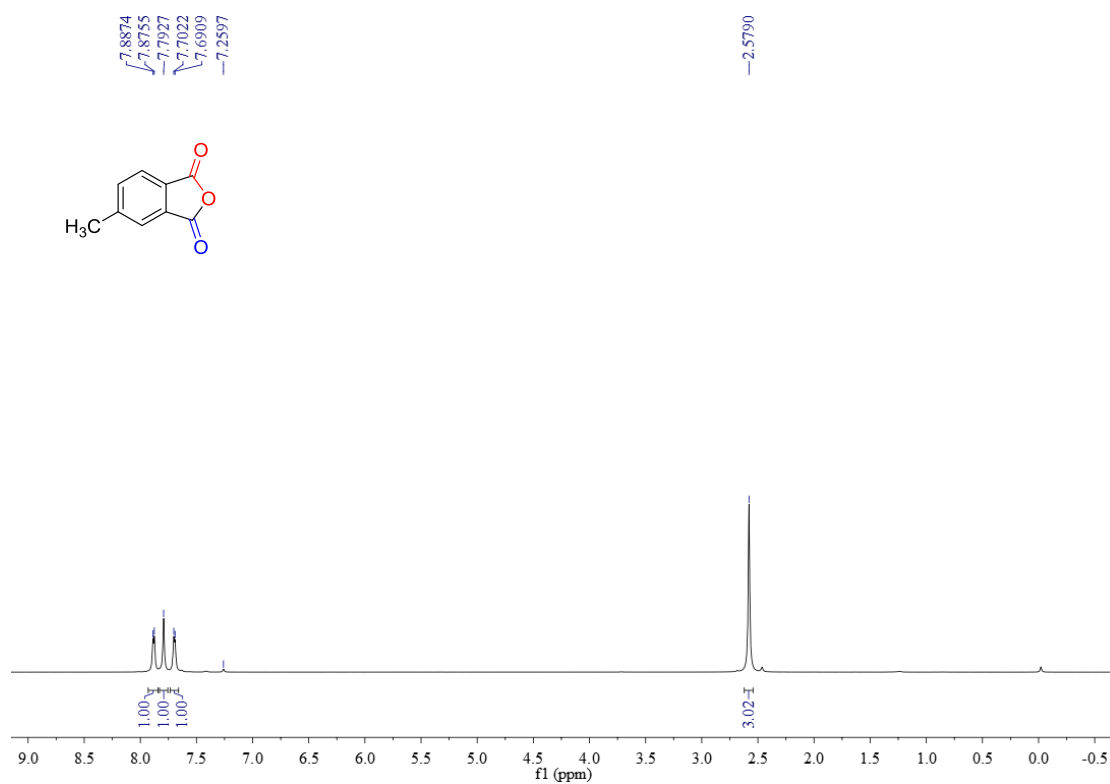

### <sup>13</sup>C NMR spectra of compound 2j

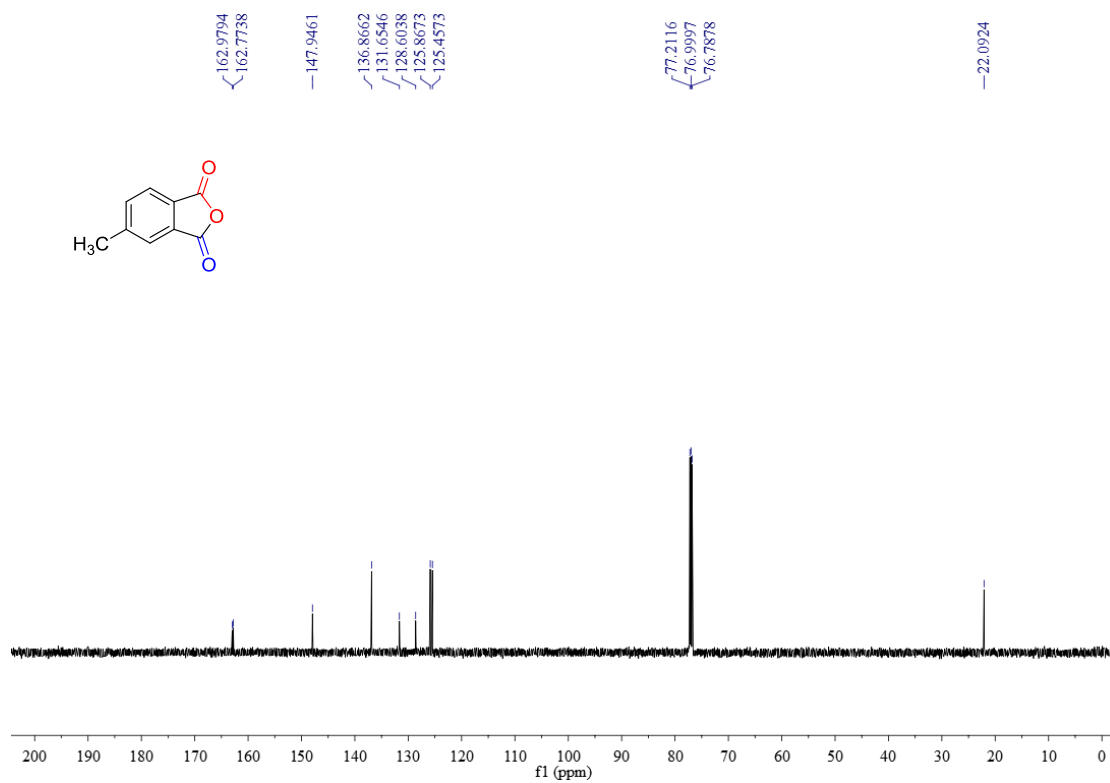

### <sup>1</sup>H NMR spectra of compound 2k

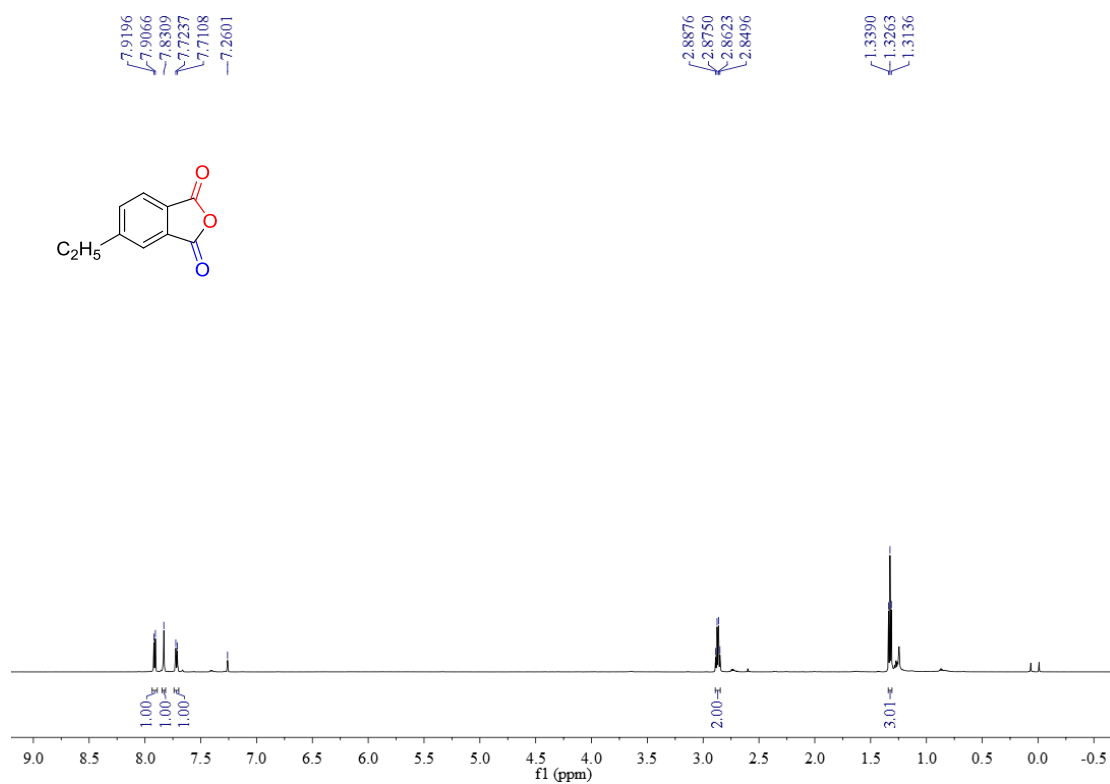

### <sup>13</sup>C NMR spectra of compound 2k

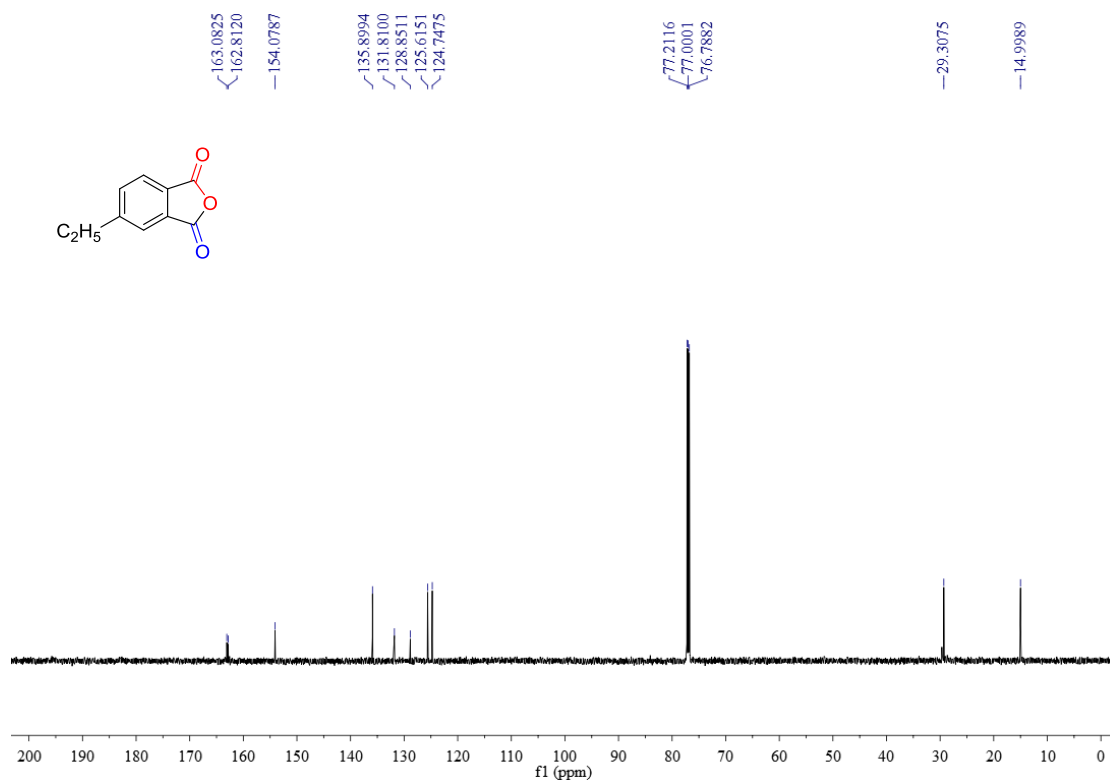

# <sup>1</sup>H NMR spectra of compound 21

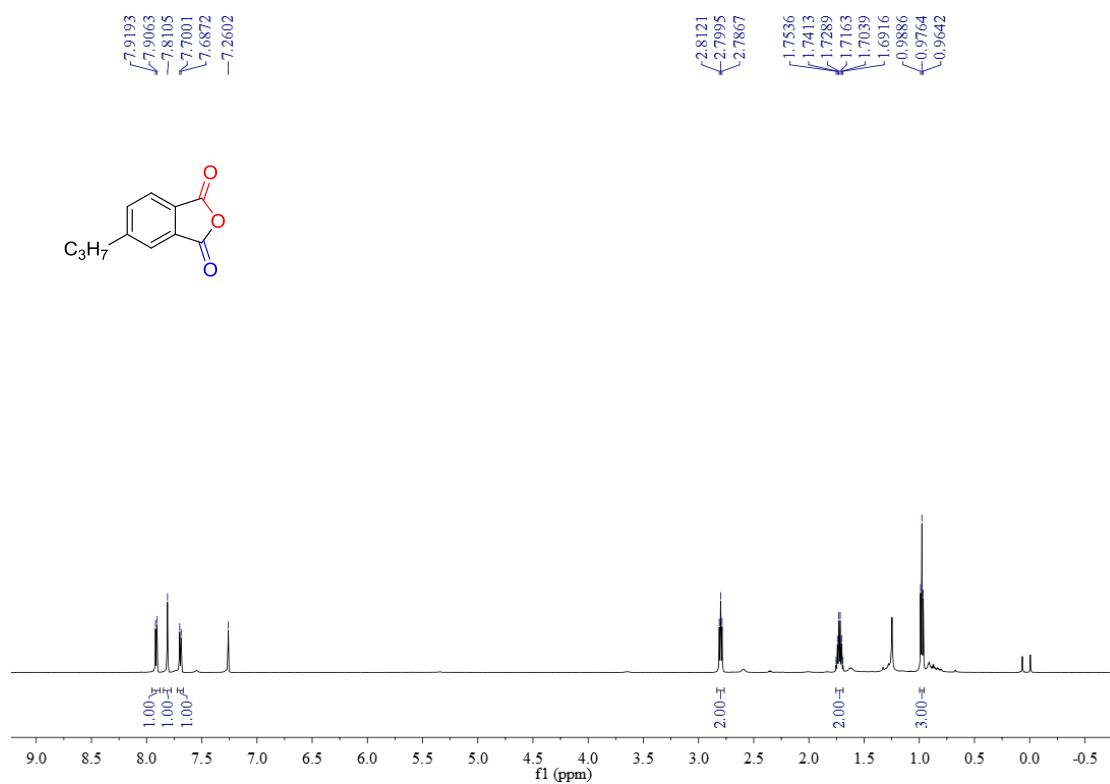

# <sup>13</sup>C NMR spectra of compound 21

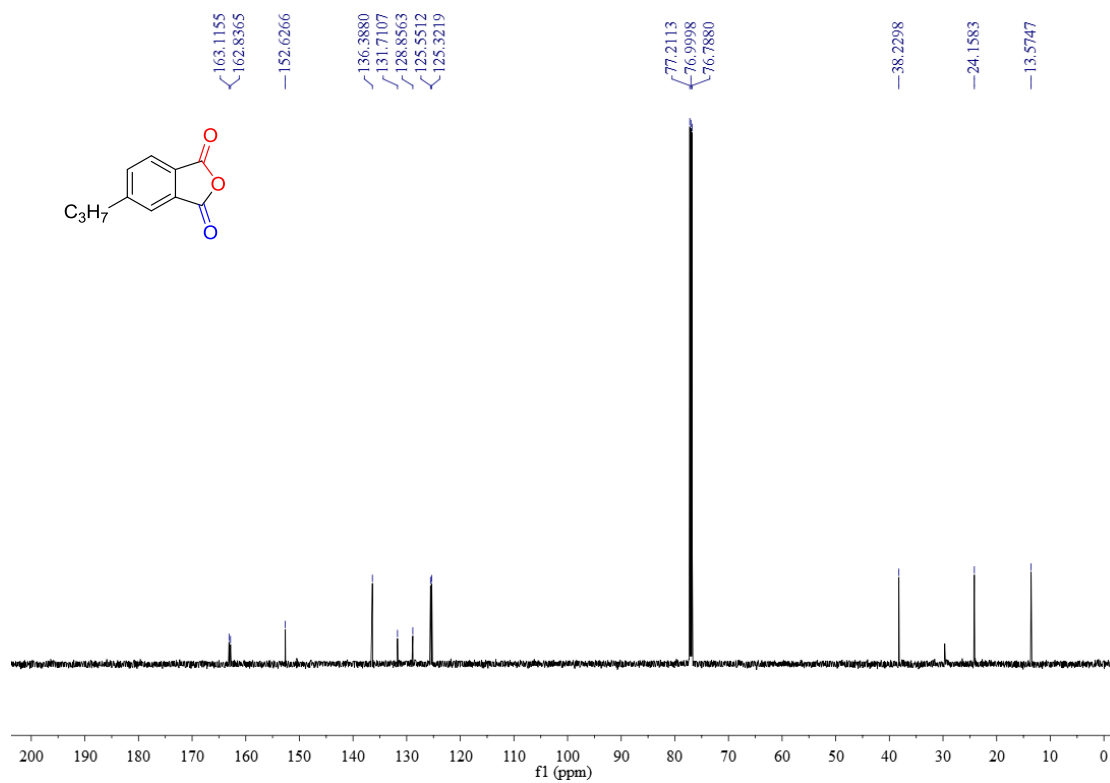

## <sup>1</sup>H NMR spectra of compound 2m

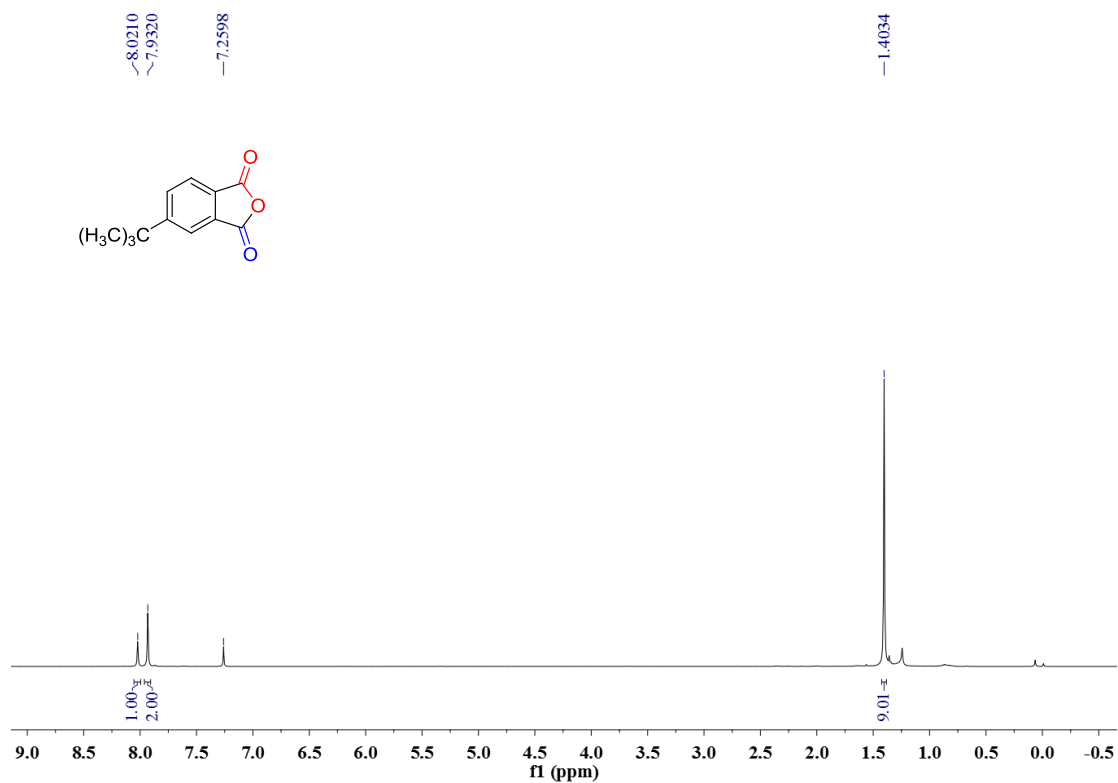

## <sup>13</sup>C NMR spectra of compound 2m

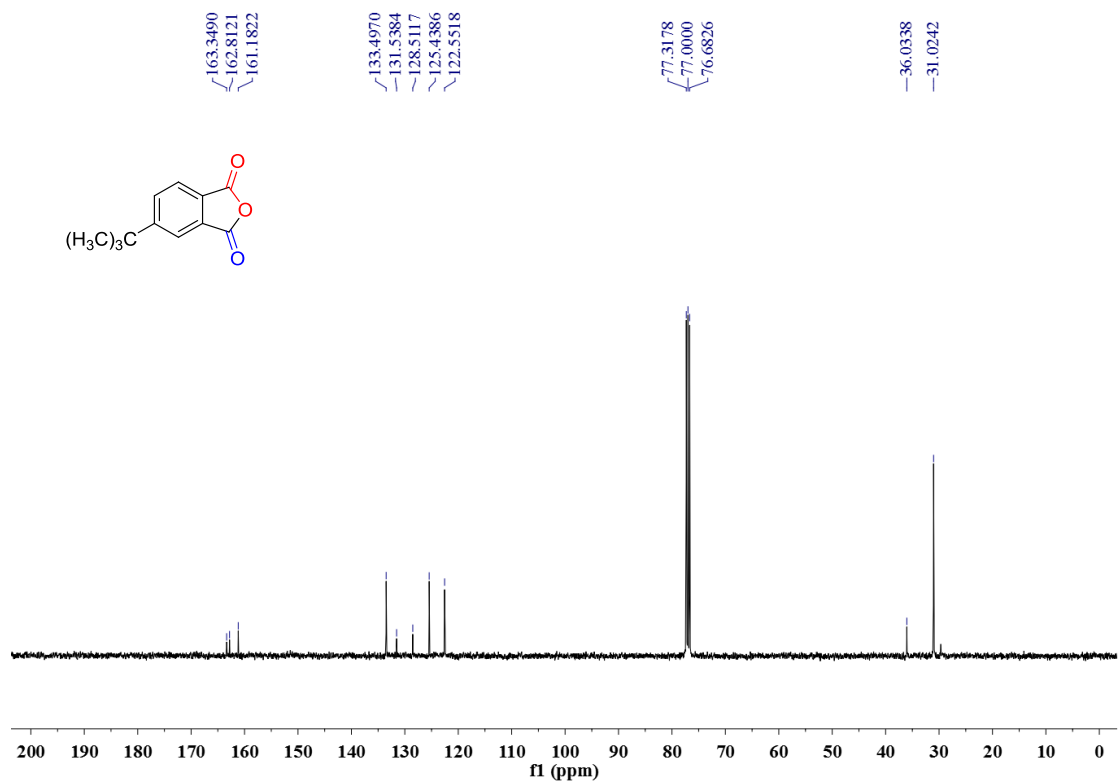

## <sup>1</sup>H NMR spectra of compound 2n

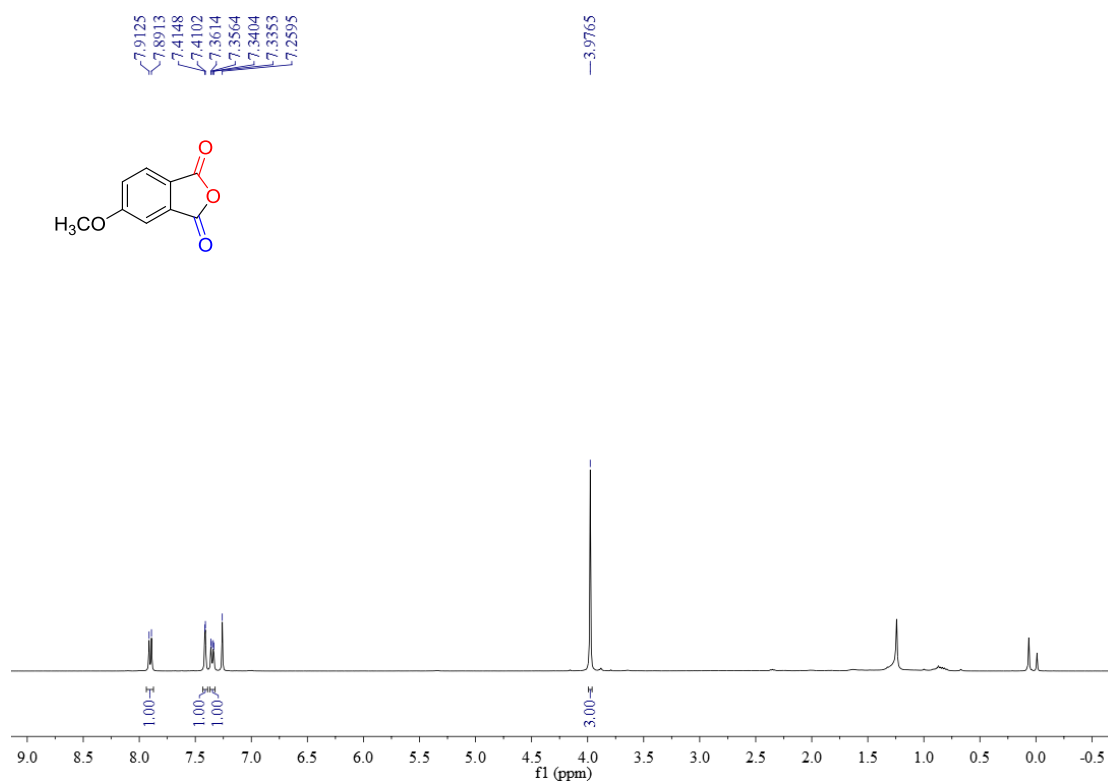

## <sup>13</sup>C NMR spectra of compound 2n

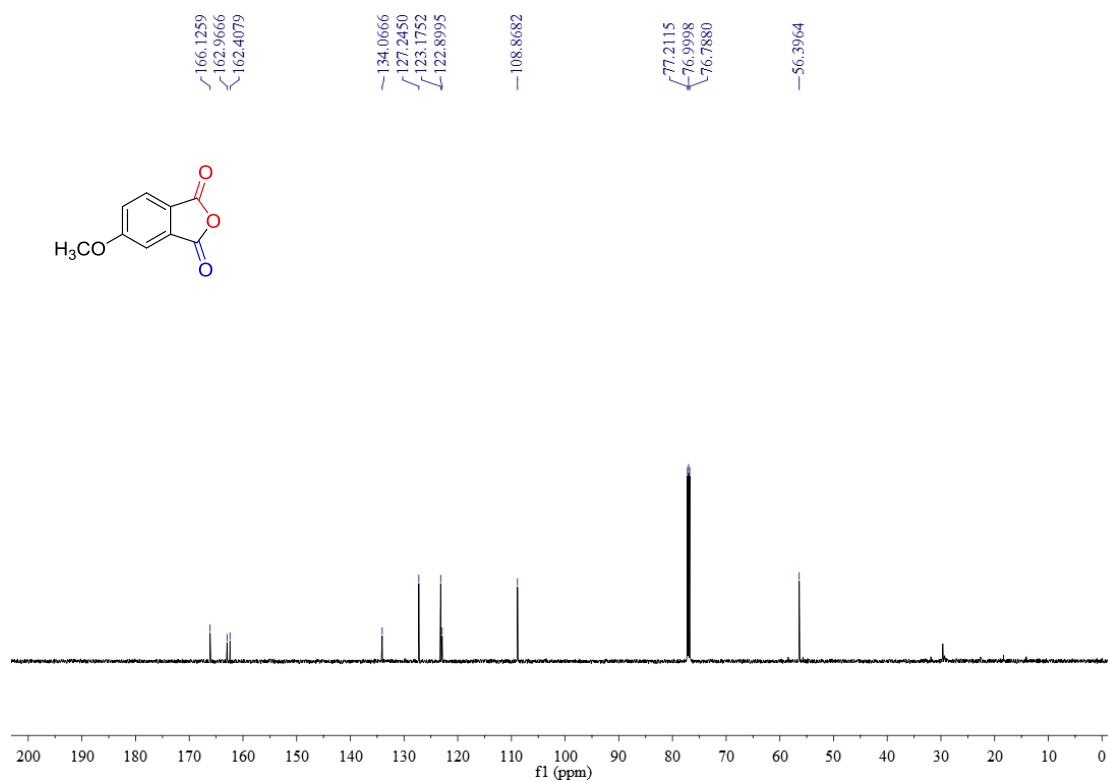

## <sup>1</sup>H NMR spectra of compound 2o

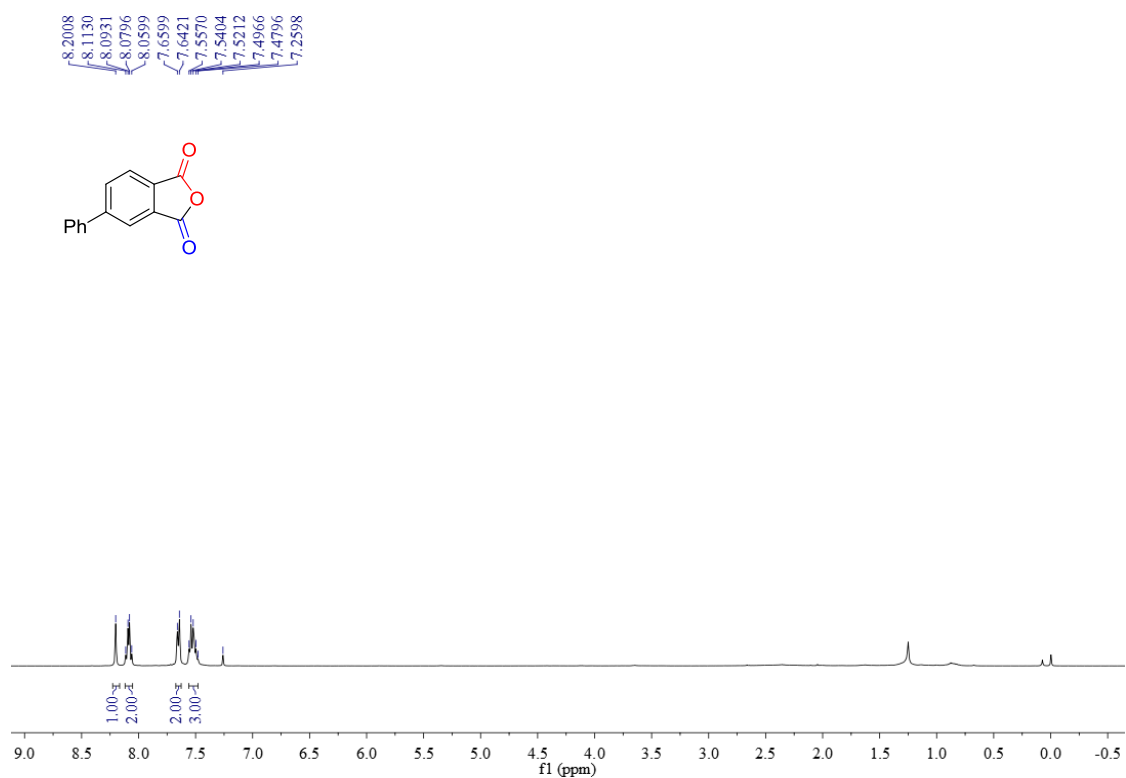

## <sup>13</sup>C NMR spectra of compound 2o

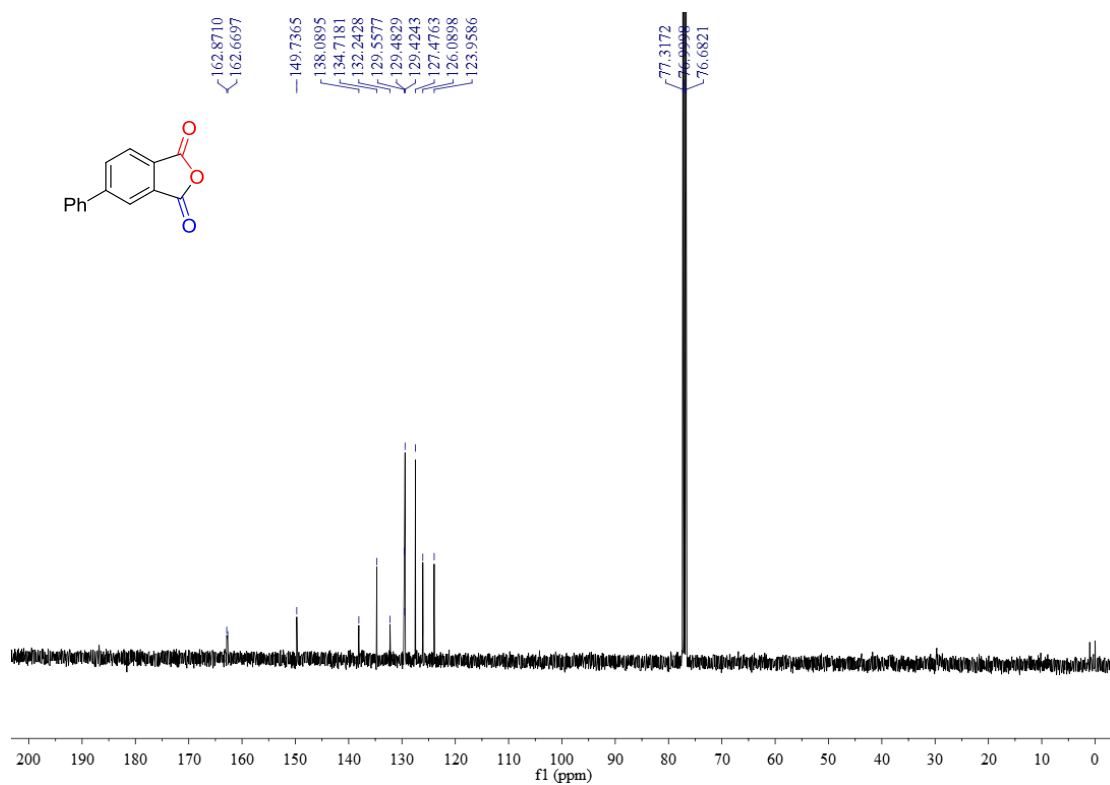

## <sup>1</sup>H NMR spectra of compound 2p

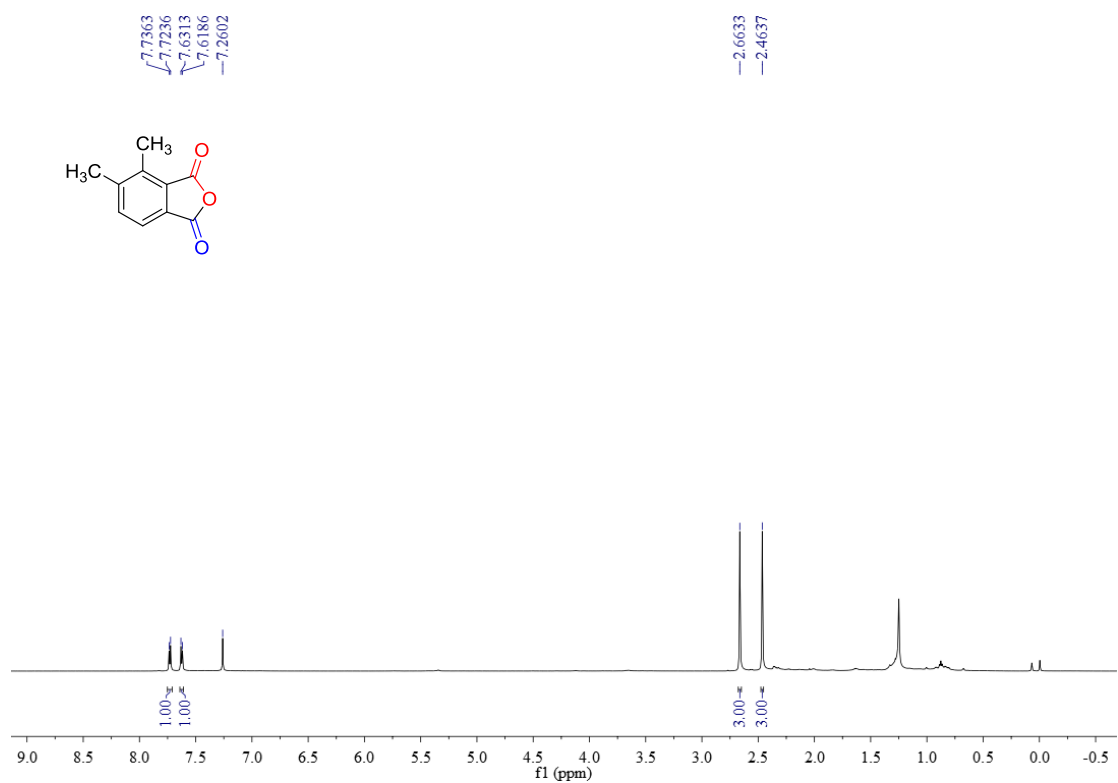

## <sup>13</sup>C NMR spectra of compound 2p

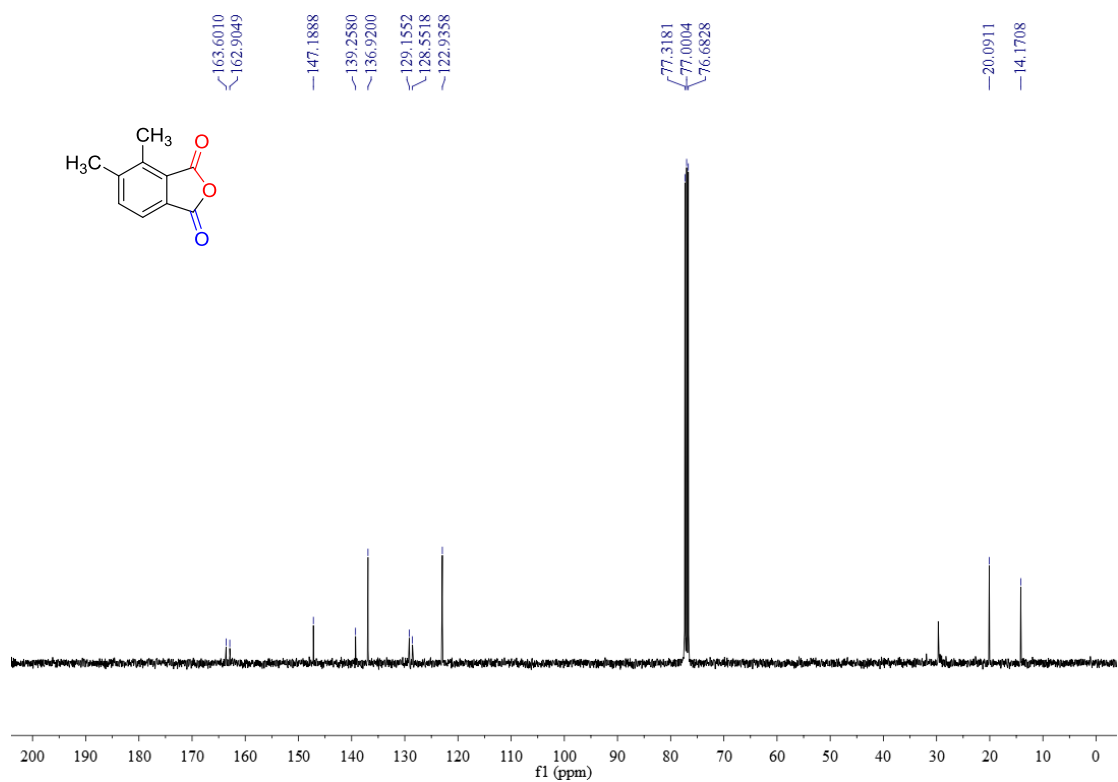



### <sup>1</sup>H NMR spectra of compound 2q

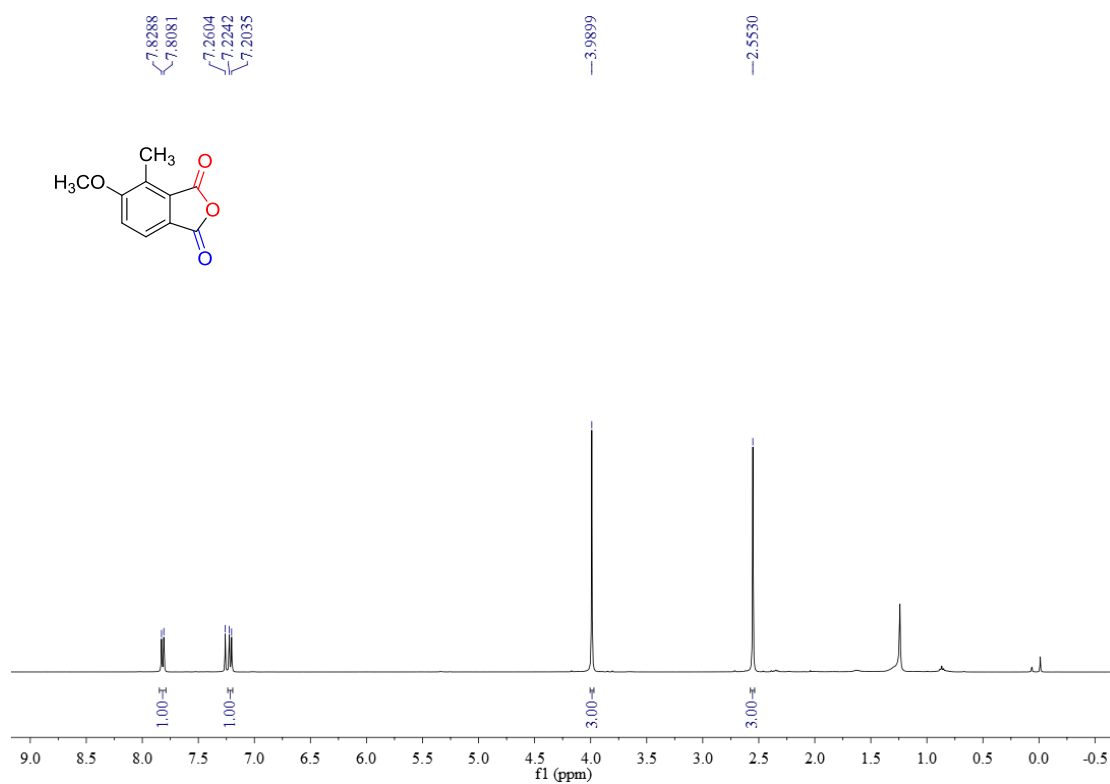

### <sup>13</sup>C NMR spectra of compound 2q

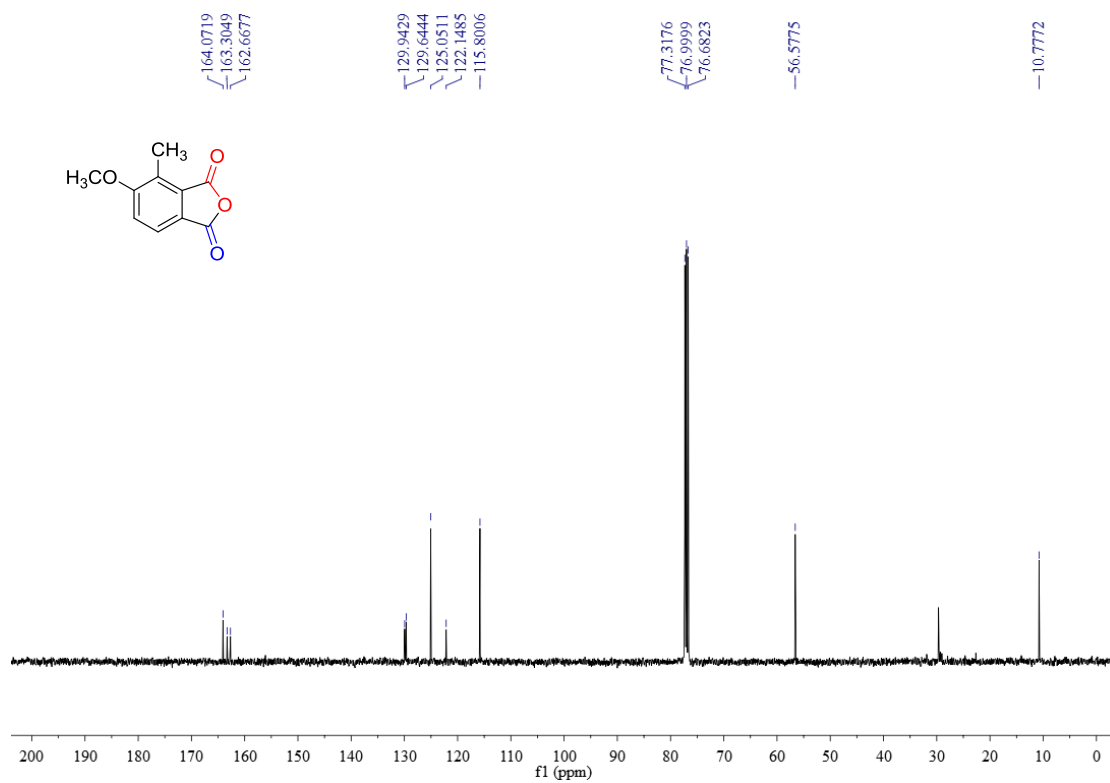

### <sup>1</sup>H NMR spectra of compound 2r

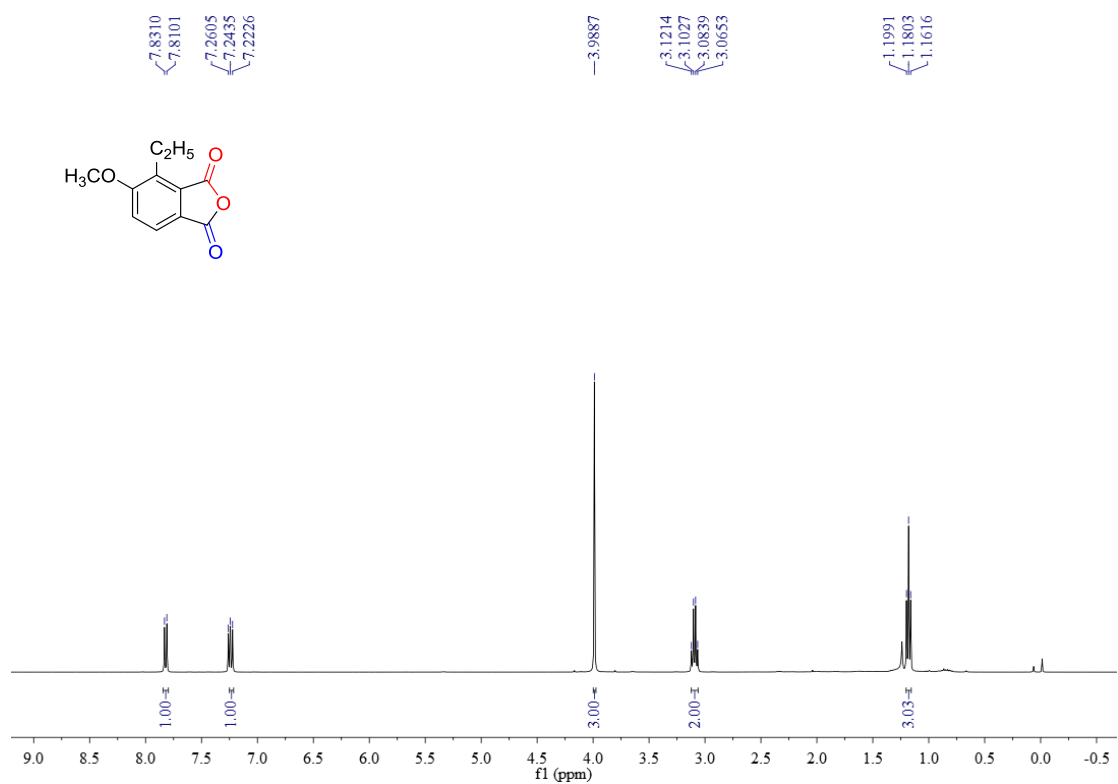

### <sup>13</sup>C NMR spectra of compound 2r

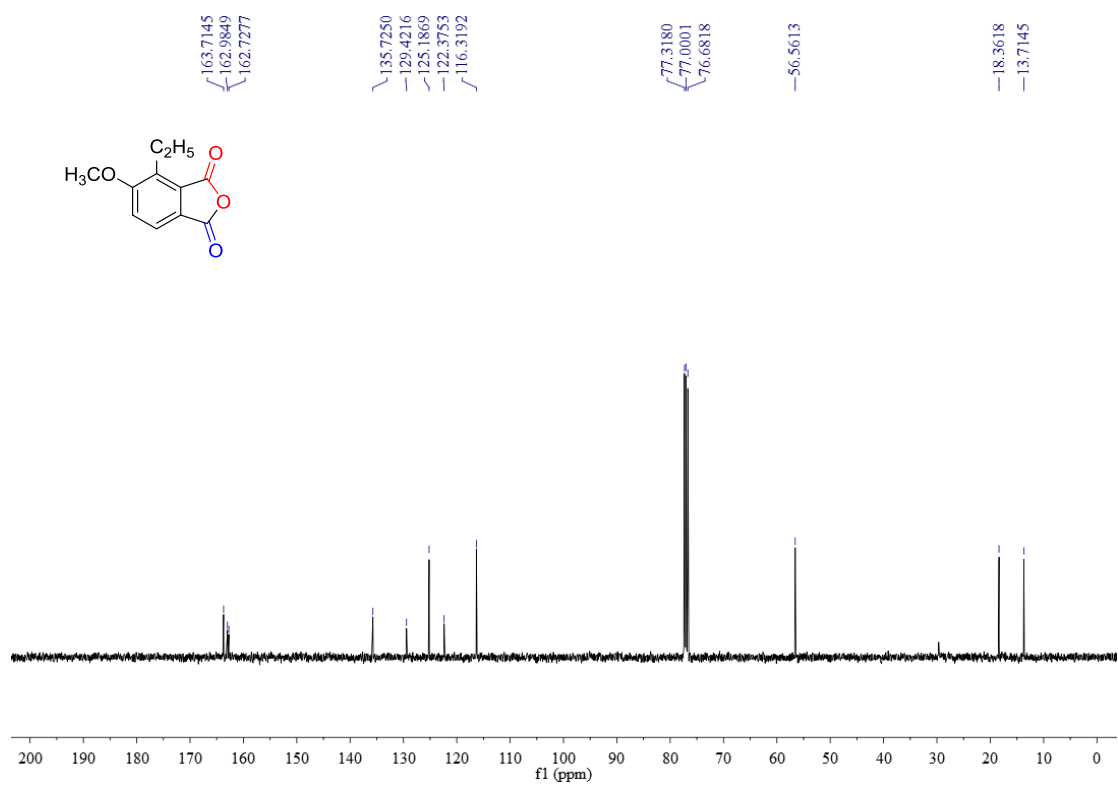

### <sup>1</sup>H NMR spectra of compound 2s

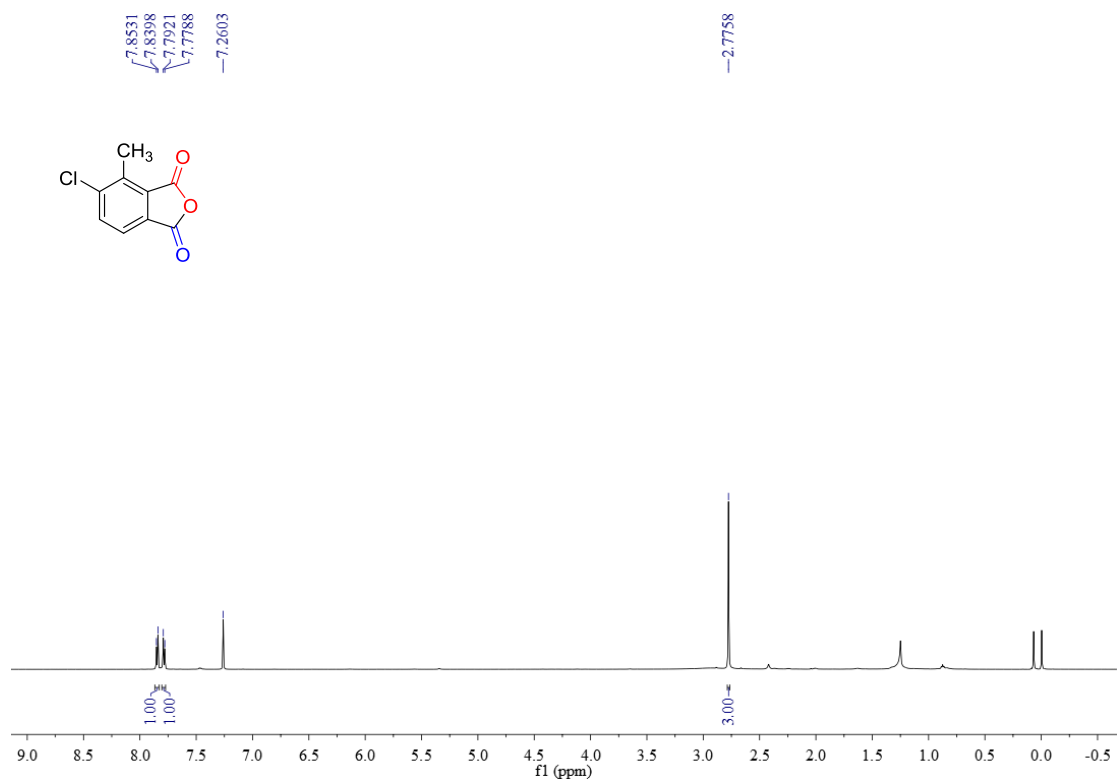

### <sup>13</sup>C NMR spectra of compound 2s

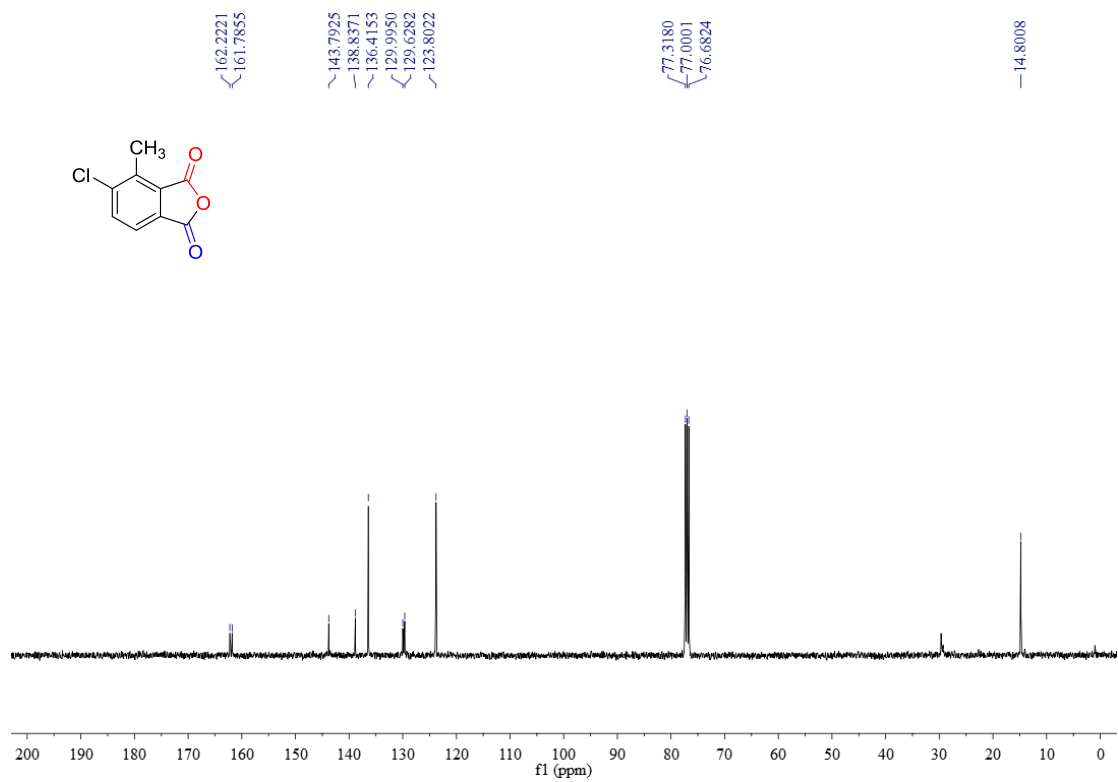

### <sup>1</sup>H NMR spectra of compound 2t

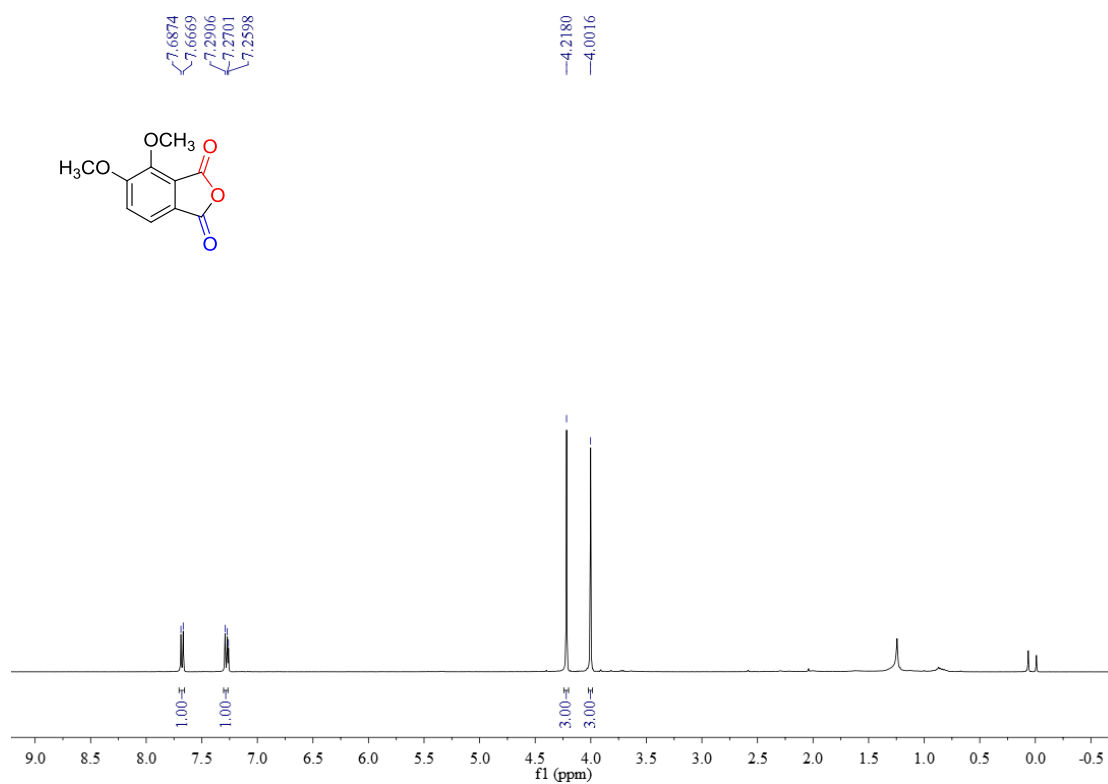

### <sup>13</sup>C NMR spectra of compound 2t

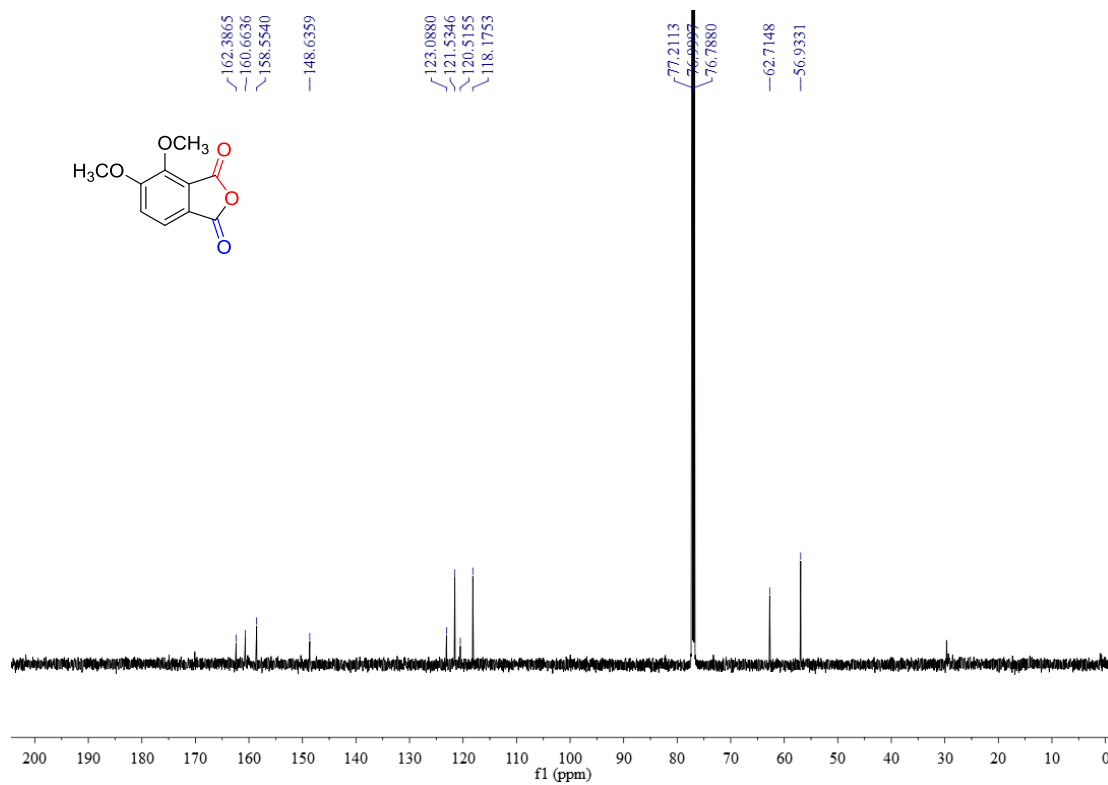

## <sup>1</sup>H NMR spectra of compound 2u

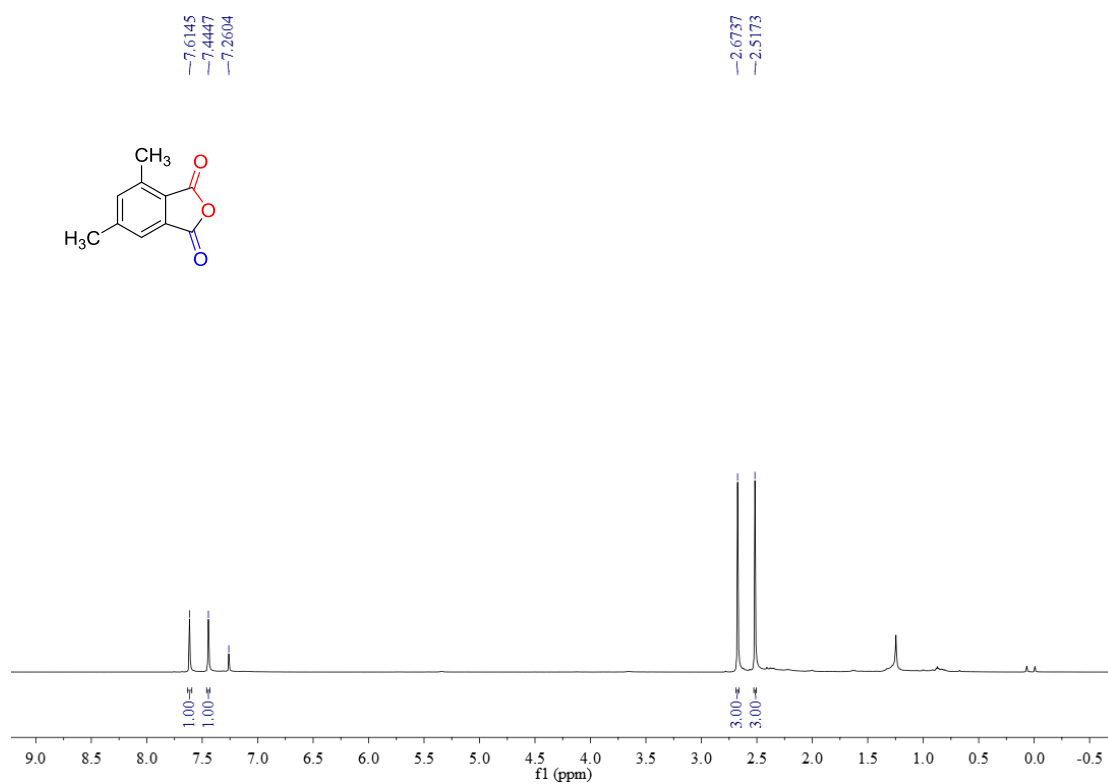

## <sup>13</sup>C NMR spectra of compound 2u

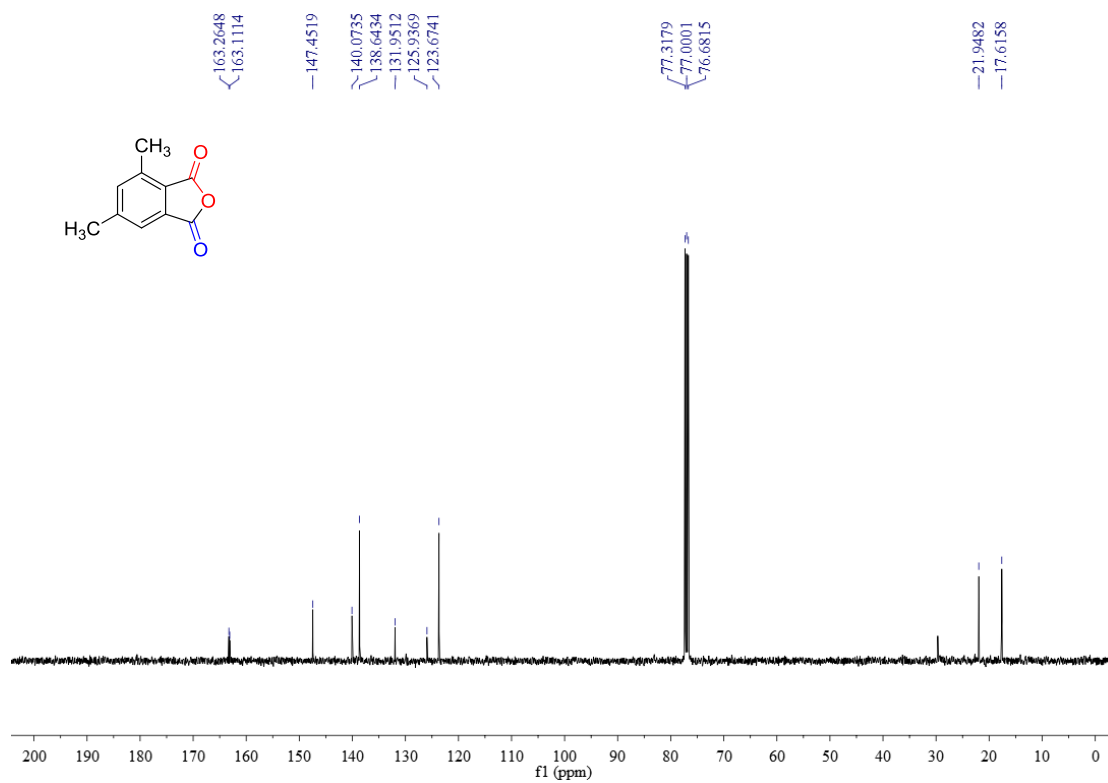

## <sup>1</sup>H NMR spectra of compound 2v

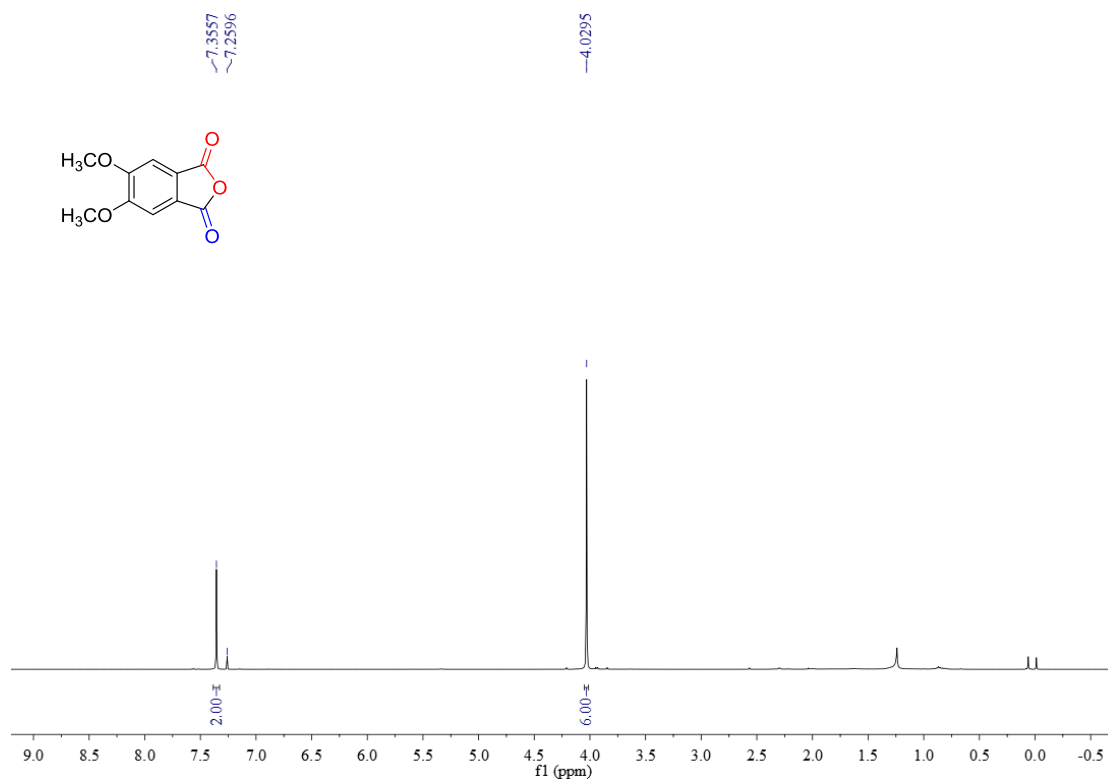

## <sup>13</sup>C NMR spectra of compound 2v

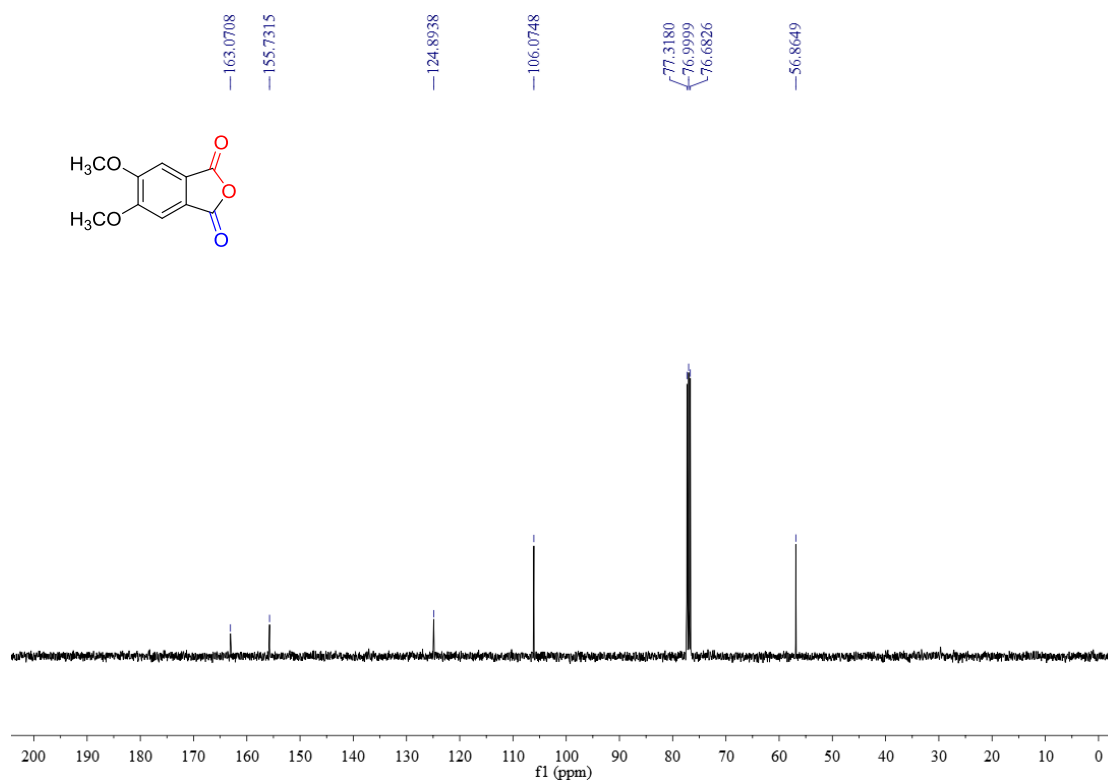

## <sup>1</sup>H NMR spectra of compound 2w

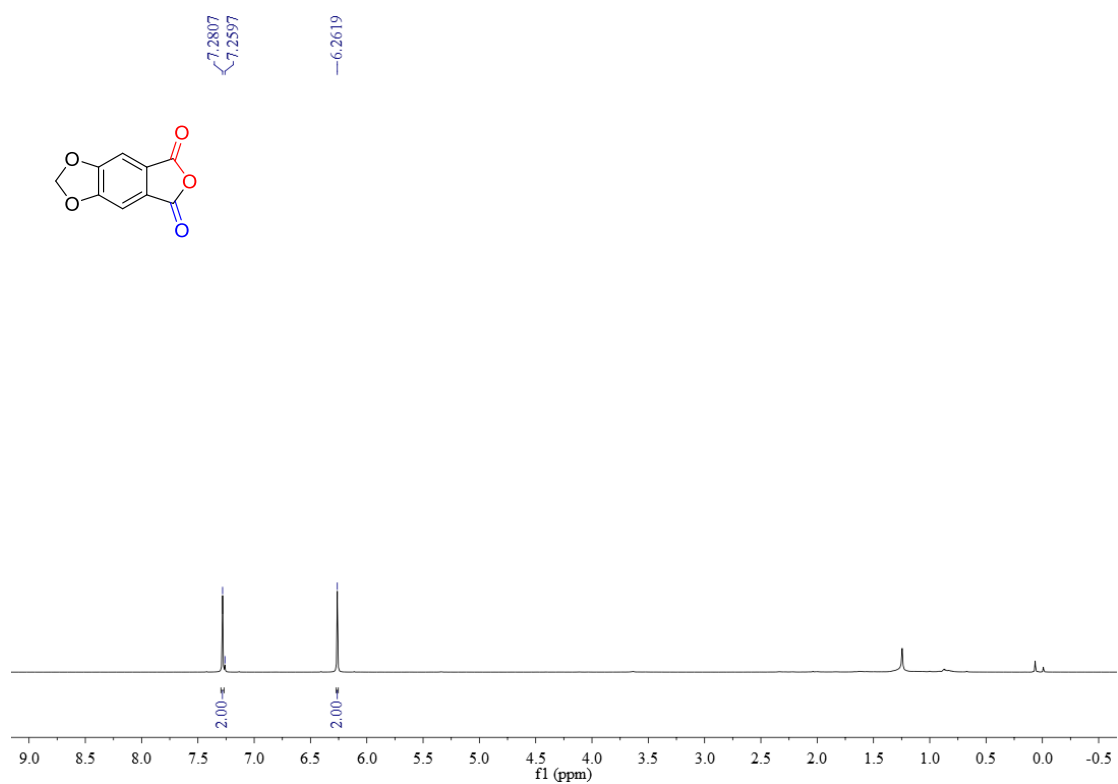

## <sup>13</sup>C NMR spectra of compound 2w

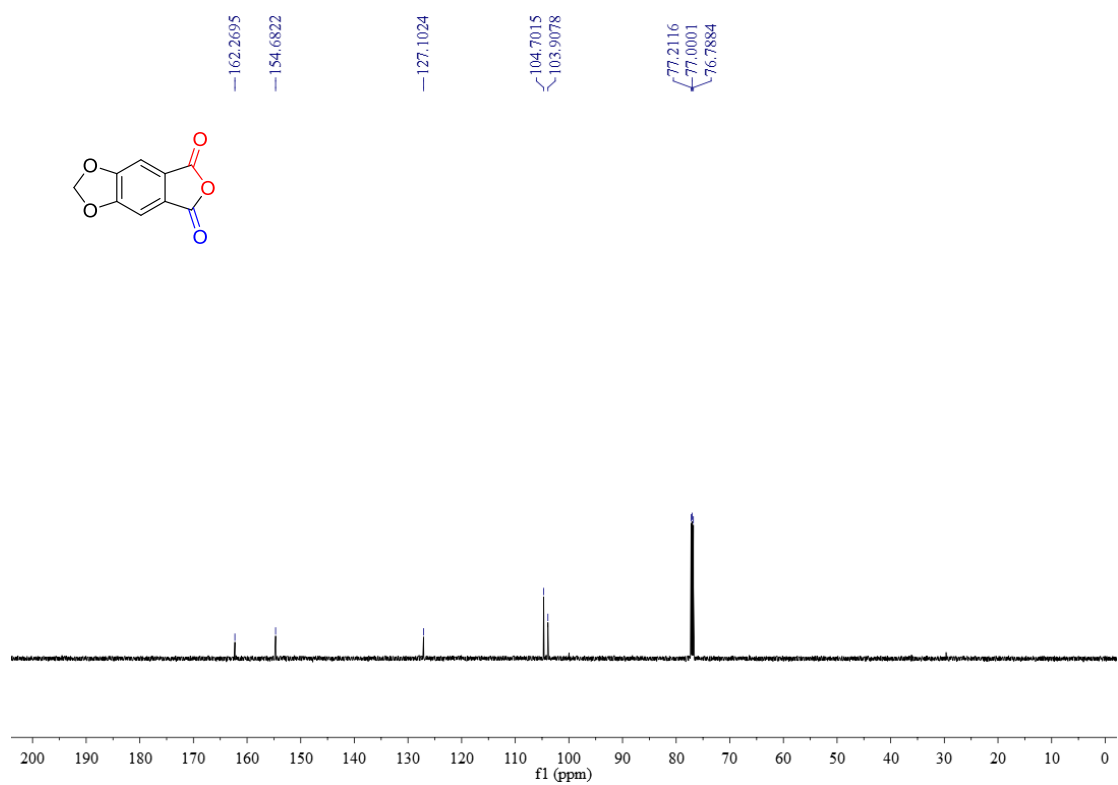

### <sup>1</sup>H NMR spectra of compound 2x

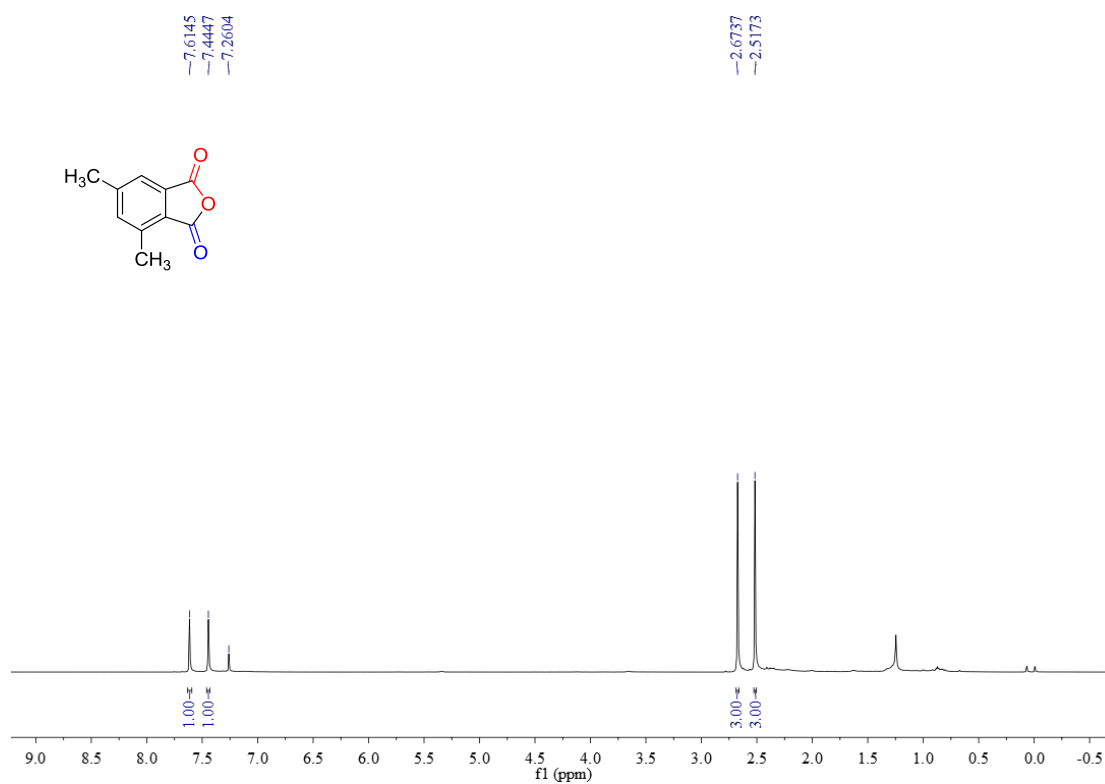

### <sup>13</sup>C NMR spectra of compound 2x

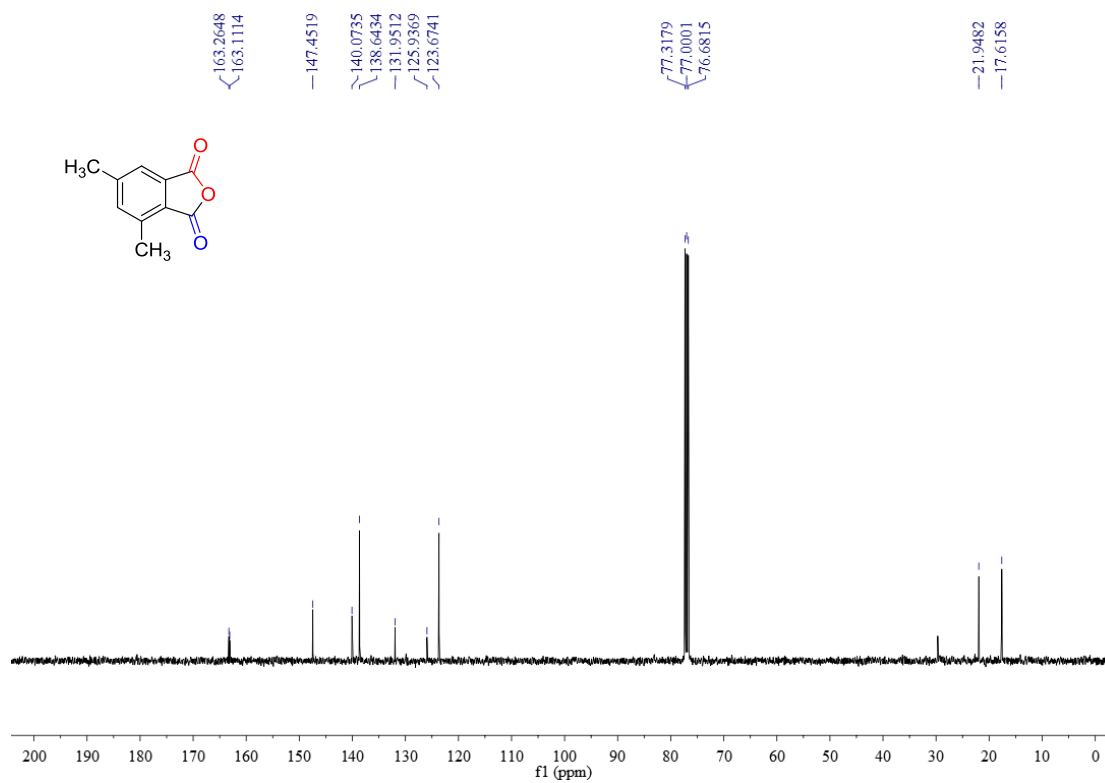



### <sup>1</sup>H NMR spectra of compound 2y

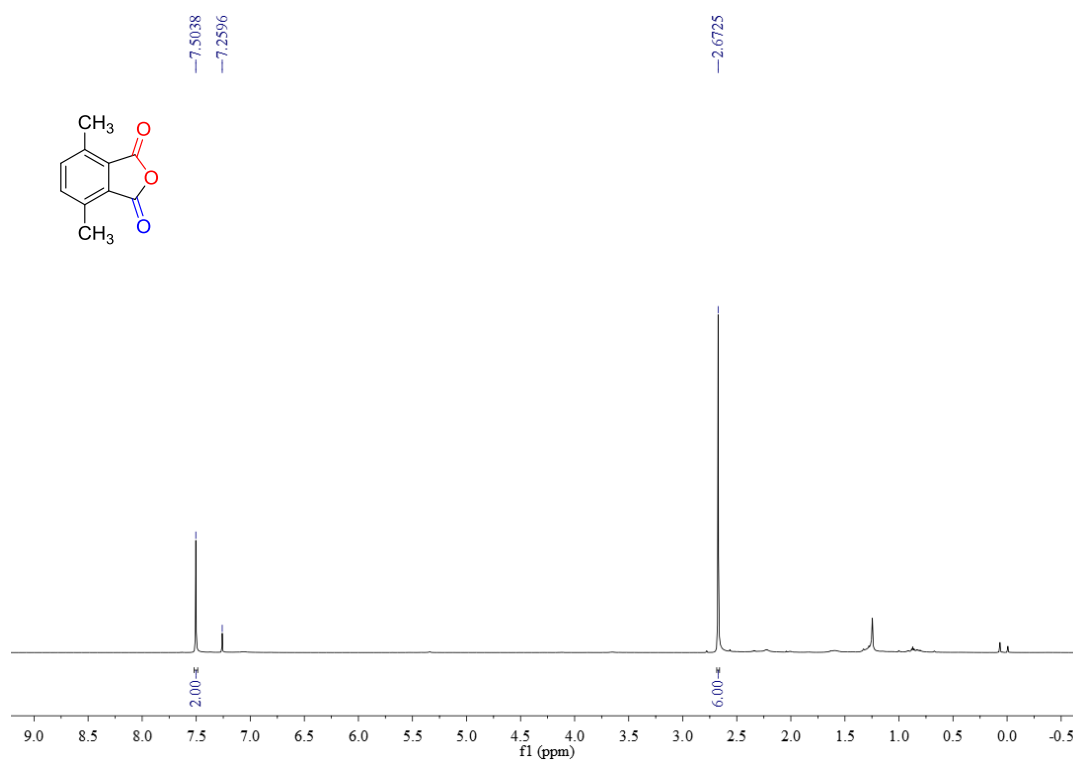

### <sup>13</sup>C NMR spectra of compound 2y

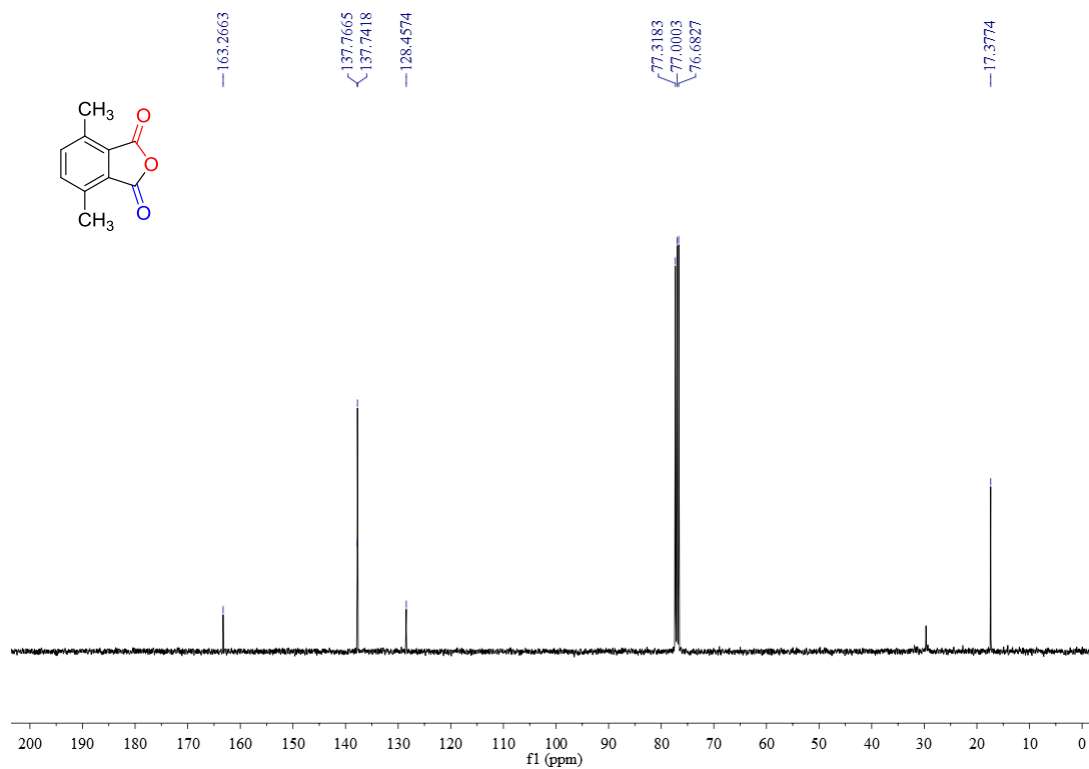

Supplement: d3qo00219e1.pdf [file d3qo00219e1.pdf]
